# Supplementary material for: Ellipse packing in two-dimensional cell tessellation: a theoretical explanation for Lewis’s law and Aboav-Weaire’s law
Source: PeerJ. 2019 May 15;7:e6933. doi: 10.7717/peerj.6933 (PMC6525589; doi:10.7717/peerj.6933)
Supplement: Data S1 [file peerj-07-6933-s002.xlsx]

## Sheet: examples
sample1			X	Y		DVC	d		R	FD
cell1	vertices	1	357	783		78.7601	0.81265		80.9486	-2.70352
		2	478	785		86.6846	-0.690159		85.6387	1.22132
		3	496	872		90.6139	0.358708		91.8351	-1.32985
		4	425	914		75.0989	1.38536		73.2513	2.52225
		5	330	878		89.5299	-0.436017		91.8517	-2.52775
		6	314	825		98.3337	0.155081		95.6325	2.82461
	center		400	842.8
	sidesnumber		6
	AC		10771
	geometric parameters of ellipse	XEC	411.154				arctan(tan(q))	AE	AMIP	AC/AMIP
		YEC	840.189				-0.0390207	22215.8	18373.1	0.586236
		semi-major-axis	96.9919
		semi-minor-axis	72.9115
		q	3.10257
sample2			X	Y		DVC	d		R	FD
cell2	vertices	1	697	456		76.6291	0.409068		76.6291	-1.89723e-06
		2	760	411		75.8323	1.47429		75.8323	-6.99173e-07
		3	842	467		77.1917	-0.255111		77.1917	1.40768e-06
		4	752	561		76.0762	-1.36821		76.0762	1.39323e-06
	midpoints	1	728.5	433.5
		2	801	439
		3	797	514
		4	724.5	508.5
	center		763.3	473.8
	sidesnumber		4
	AC		10999.5
	geometric parameters of ellipse	XEC	767.307				arctan(tan(q))	AE	AMIP	AC/AMIP
		YEC	486.48				-0.270865	18379	11701	0.94005
		semi-major-axis	77.1921
		semi-minor-axis	75.7913
		q	2.87073
sample3			X	Y		DVC	d		R	FD
cell3	vertices	1	540	980		73.1675	0.490757		72.4256	1.02443
		2	649	966		65.7878	-0.828571		66.2512	-0.699403
		3	681	1042		81.2682	0.345418		80.4709	0.990798
		4	597	1063		49.0978	-1.41678		51.9033	-5.4052
		5	536	1062		83.3934	-0.606248		77.2399	7.96676
		6	520	1044		89.5371	-0.335941		93.0083	-3.73215
		7
		8
	center		587.2	1026.3
	sidesnumber		6
	AC		11684
	geometric parameters of ellipse	XEC	604.532				arctan(tan(q))	AE	AMIP	AC/AMIP
		YEC	1014.48				-0.102454	15903.5	13152.7	0.888338
		semi-major-axis	99.9561
		semi-minor-axis	50.6469
		q	3.03914
