# Supplementary material for: Ellipse packing in two-dimensional cell tessellation: a theoretical explanation for Lewis’s law and Aboav-Weaire’s law
Source: PeerJ. 2019 May 15;7:e6933. doi: 10.7717/peerj.6933 (PMC6525589; doi:10.7717/peerj.6933)
Supplement: Data S3 [file peerj-07-6933-s004.xlsx]

## Sheet: table2Fig4
	avg all	5.81671				6.23433		1.48881					0.904533					6.10529	6.11729	6.0998
																		calculated m				(mC-mR)							(mC-mR)2
	fig source	number of edge	area of polygonal cell (pixel2)	Ellipse semi-major-axis (pixel)	Ellipse semi-minor-axis (pixel)	real m		major/minor axis	avg	std	Area of ellipse (pixel2)	max inscribed polygon (pixel2)	polygonal cell/max inscribed polygon	avg	std	polygonal cell/Ellipse	lewis's law	eq 11	eq 15	eq 12		eq 11	eq 15	eq 12		(mC-mR)			eq 11	eq 15	eq 12		(mC-mR)2
	Büchner et al. 2016 Fig2b two-dimensional SiO2 ring	8	5806.5	48.8459	42.2669	5.5		1.15565			6486.02	5839.47	0.994354			0.895233	5839.47	5.69025		5.71109		0.190253		0.211086		eq 11	eq 15	eq 12	0.0361962		0.0445574		eq 11	eq 15	eq 12
		7	4722	42.6262	40.7533	5.85714		1.04596			5457.43	4753.57	0.993359			0.865242	4753.57	5.83867		5.85058		-0.01847		-0.00656523	min	-1.52631	-1.5197	-1.54298	0.000341141		4.31022e-05	min	0	0	0
		6	3348	42.8139	30.5106	6.14286		1.40325			4103.79	3393.8	0.986504			0.815832	3393.8	6		6		-0.142857		-0.142857	max	1.37205	1.3389	1.33038	0.0204082		0.0204082	max	2.32963	2.30948	2.38078
		6	3159	36.2334	33.3889	6.33333		1.08519			3800.67	3143.13	1.00505			0.831168	3143.13	6		6		-0.333333		-0.333333	avg	-0.129041	-0.109545	-0.134524	0.111111		0.111111	avg	0.11403	0.11522	0.113369
		5	2205.5	34.0719	27.6445	6.4		1.2325			2959.07	2239.5	0.984817			0.745336	2239.5	6.26317		6.2465		-0.136833		-0.1535	std	0.312476	0.321796	0.309079	0.0187234		0.0235622	std	0.221397	0.226912	0.220721
		5	2127	33.5194	26.9887	6.4		1.24198			2842.03	2150.92	0.988878			0.748409	2150.92	6.26506		6.2484		-0.134937		-0.151604	number	371	311	371	0.018208		0.0229837	number	371	311	371
		6	3371.5	40.1963	32.7748	6.16667		1.22644			4138.81	3422.77	0.985021			0.814606	3422.77	6		6		-0.166667		-0.166667					0.0277778		0.0277778
		6	3293.5	37.0697	34.43	6.16667		1.07667			4009.65	3315.95	0.993229			0.821394	3315.95	6		6		-0.166667		-0.166667		percentile			0.0277778		0.0277778		percentile
		6	3196.5	41.1838	30.066	6		1.36978			3890.02	3217.02	0.993621			0.821718	3217.02	6		6		0		0	0.05	-0.656868	-0.636954	-0.662973	0		0	0.05	0	0	0
		7	4128.5	42.3158	35.7182	6		1.18471	1.20221	0.119222	4748.34	4135.93	0.998203	0.992303	0.006321	0.869461	4135.93	5.81885		5.83076		-0.18115		-0.169245	0.1	-0.5	-0.5	-0.5	0.0328152		0.0286439	0.1	9.21363e-06	0	1.61793e-08
																									0.2	-0.349721	-0.333333	-0.346775				0.2	0.00384716	0.00356329	0.00254337
	Reich et al. 2018 Fig2a shells of A. vexillum	6	787	19.3039	16.071	6.16667		1.20116			974.622	806.006	0.976419			0.807492	806.006	6		6		-0.166667		-0.166667	0.8	0.141029	0.166667	0.112405	0.0277778		0.0277778	0.8	0.135136	0.150148	0.146028
		6	1031	21.1758	19.3846	6		1.0924			1289.58	1066.47	0.966741			0.799488	1066.47	6		6		0		0	0.9	0.214946	0.264176	0.218391	0		0	0.9	0.261631	0.250748	0.275725
		5	718	18.2373	16.7798	6.4		1.08686			961.384	727.601	0.986804			0.74684	727.601	6.23404		6.21737		-0.165961		-0.182628	0.95	0.308207	0.326909	0.287945	0.0275431		0.0333529	0.95	0.444444	0.454313	0.444444
		6	1030	22.67	17.8942	6.5		1.26689			1274.42	1053.94	0.977286			0.808209	1053.94	6		6		-0.5		-0.5					0.25		0.25
		5	362	12.9048	12.1591	6.2		1.06133			492.951	373.079	0.970304			0.734352	373.079	6.22893		6.21227		0.0289331		0.0122664					0.000837122		0.000150465
		5	726.5	18.7306	16.4119	6.6		1.14128			965.744	730.901	0.993979			0.75227	730.901	6.24492		6.22826		-0.355077		-0.371744					0.12608		0.138193
		6	759	18.6899	16.1315	6.16667		1.15859			947.179	783.311	0.968964			0.801327	783.311	6		6		-0.166667		-0.166667					0.0277778		0.0277778
		6	1078.5	21.5132	19.5334	6.33333		1.10136			1320.18	1091.78	0.987837			0.816935	1091.78	6		6		-0.333333		-0.333333					0.111111		0.111111
		5	601.5	17.0851	14.9078	6.4		1.14605			800.165	605.586	0.993252			0.75172	605.586	6.24588		6.22921		-0.154123		-0.170789					0.0237538		0.029169
		6	819.5	20.1169	16.064	5.83333		1.2523			1015.23	839.588	0.976074			0.807207	839.588	6		6		0.166667		0.166667					0.0277778		0.0277778
	Reich et al. 2018 Fig2b shells of A. rigida	5	917.5	20.8103	19.3814	6.4		1.07372			1267.11	958.982	0.956744			0.724089	958.982	6.23141		6.21474		-0.168589		-0.185255					0.0284221		0.0343195
		6	1181	23.9993	19.4987	6.5		1.23082			1470.12	1215.78	0.971392			0.803334	1215.78	6		6		-0.5		-0.5					0.25		0.25
		6	901	19.2527	18.3962	6		1.04656			1112.68	920.177	0.979159			0.809758	920.177	6		6		0		0					0		0
		7	1044.5	21.9731	17.8711	5.71429		1.22953			1233.66	1074.55	0.972038			0.846671	1074.55	5.81245		5.82435		0.0981624		0.110067					0.00963586		0.0121148
		6	552	15.6034	13.8636	6.33333		1.1255			679.585	562.013	0.982184			0.81226	562.013	6		6		-0.333333		-0.333333					0.111111		0.111111
		5	544	17.1534	13.8212	6.4		1.2411			744.813	563.695	0.965062			0.730384	563.695	6.26489		6.24822		-0.135114		-0.151781					0.0182558		0.0230374
		6	749	18.106	16.3451	6.33333		1.10773			929.736	768.885	0.974138			0.805605	768.885	6		6		-0.333333		-0.333333					0.111111		0.111111
		5	406.5	14.1367	12.2622	6.4		1.15286			544.586	412.158	0.986273			0.746438	412.158	6.24724		6.23057		-0.152761		-0.169427					0.0233359		0.0287057
		6	1243.5	22.4714	21.6511	6.16667		1.03789			1528.48	1264.04	0.983747			0.813552	1264.04	6		6		-0.166667		-0.166667					0.0277778		0.0277778
		5	597	17.3991	15.1086	6.4		1.15161			825.847	625.023	0.955165			0.722894	625.023	6.24699		6.23032		-0.153012		-0.169679					0.0234127		0.0287909
	Reich et al. 2018 Fig2c shells of P. nobilis	6	1503.5	25.241	23.4264	5.83333		1.07746			1857.64	1536.26	0.978676			0.809359	1536.26	6		6		0.166667		0.166667					0.0277778		0.0277778
		6	1310	24.5106	21.1448	5.83333		1.15918			1628.2	1346.51	0.972883			0.804568	1346.51	6		6		0.166667		0.166667					0.0277778		0.0277778
		5	1306.5	24.8078	23.0587	6.2		1.07585			1797.1	1360.09	0.960595			0.727004	1360.09	6.23184		6.21517		0.0318376		0.015171					0.00101363		0.000230158
		5	1587	29.0181	23.78	6.4		1.22027			2167.86	1640.69	0.967275			0.73206	1640.69	6.26072		6.24405		-0.139279		-0.155946					0.0193987		0.0243191
		7	2859	36.2605	28.9214	6.28571		1.25376			3294.6	2869.68	0.996278			0.867785	2869.68	5.80899		5.82089		-0.476728		-0.464823					0.227269		0.21606
		6	1324	24.4037	21.6663	6		1.12635			1661.08	1373.7	0.96382			0.797072	1373.7	6		6		0		0					0		0
		6	2276.5	31.318	29.6195	6.5		1.05734			2914.22	2410.04	0.944589			0.781169	2410.04	6		6		-0.5		-0.5					0.25		0.25
		6	1691.5	26.3095	25.5293	5.83333		1.03056			2110.09	1745.03	0.969326			0.801626	1745.03	6		6		0.166667		0.166667					0.0277778		0.0277778
		5	1933.5	31.5271	28.6007	6.8		1.10232			2832.77	2143.91	0.901856			0.682549	2143.91	6.23713		6.22046		-0.562869		-0.579536					0.316822		0.335862
		5	1417.5	26.3491	24.1041	6.2		1.09314	1.13673	0.0712602	1995.29	1510.09	0.938686	0.970585	0.0187148	0.710422	1510.09	6.23529		6.21863		0.0352939		0.0186272					0.00124566		0.000346973
	Aboav 1980 Fig1d soap	6	1535.5	26.1413	22.7242	6.33333		1.15037			1866.24	1543.36	0.994904			0.822779	1543.36	6		6		-0.333333		-0.333333					0.111111		0.111111
		6	1632.5	27.5251	23.5143	6.33333		1.17057			2033.34	1681.56	0.970825			0.802866	1681.56	6		6		-0.333333		-0.333333					0.111111		0.111111
		5	929	21.5917	18.5731	6.6		1.16253			1259.85	953.492	0.974314			0.737387	953.492	6.24917		6.23251		-0.350827		-0.367494					0.12308		0.135052
		7	2564	32.3559	29.4517	6.28571		1.09861			2993.73	2607.62	0.983272			0.856456	2607.62	5.83115		5.84306		-0.454563		-0.442658					0.206628		0.195946
		7	1567.5	25.0279	23.3903	5.85714		1.07001			1839.12	1601.92	0.97851			0.852308	1601.92	5.83524		5.84714		-0.0219064		-0.0100017					0.000479891		0.000100033
		5	1034.5	22.5585	19.7256	6.4		1.14361			1397.95	1058	0.977785			0.740014	1058	6.24539		6.22872		-0.154611		-0.171278					0.0239045		0.029336
		6	1734	27.0584	25.0884	6.16667		1.07852			2132.68	1763.71	0.983156			0.813063	1763.71	6		6		-0.166667		-0.166667					0.0277778		0.0277778
		8	3008.5	34.439	31.2701	5.875		1.10134			3383.21	3045.96	0.987703			0.889245	3045.96	5.70383		5.72466		-0.171168		-0.150335					0.0292986		0.0226006
		6	2019.5	28.9899	27.2283	6.5		1.0647			2479.81	2050.79	0.984745			0.814377	2050.79	6		6		-0.5		-0.5					0.25		0.25
		5	881	20.6467	18.4322	6.4		1.12014			1195.58	904.844	0.973648			0.736883	904.844	6.2407		6.22403		-0.159305		-0.175972					0.025378		0.030966
	Aboav 1980 Fig1e soap	5	1894	29.6931	27.5333	6.8		1.07844			2568.41	1943.84	0.974361			0.737422	1943.84	6.23235		6.21569		-0.567645		-0.584312					0.322221		0.34142
		5	1664	27.4536	25.5846	6.8		1.07305			2206.62	1670.03	0.996391			0.754095	1670.03	6.23128		6.21461		-0.568723		-0.585389					0.323445		0.342681
		6	2823	34.8714	31.9256	6.66667		1.09227			3497.5	2892.41	0.976004			0.807149	2892.41	6		6		-0.666667		-0.666667					0.444444		0.444444
		6	3449.5	38.9368	35.0449	6.5		1.11105			4286.82	3545.17	0.973013			0.804676	3545.17	6		6		-0.5		-0.5					0.25		0.25
		6	4836.5	48.6998	40.2786	6.33333		1.20907			6162.43	5096.29	0.949024			0.784837	5096.29	6		6		-0.333333		-0.333333					0.111111		0.111111
		6	3335	37.8954	34.9047	6.33333		1.08568			4155.47	3436.55	0.970451			0.802556	3436.55	6		6		-0.333333		-0.333333					0.111111		0.111111
		5	2963	39.5994	32.737	7		1.20962			4072.65	3082.29	0.961299			0.727537	3082.29	6.25859		6.24192		-0.741409		-0.758075					0.549687		0.574678
		6	2648	33.7077	31.2577	6.33333		1.07838			3310.06	2737.4	0.967341			0.799985	2737.4	6		6		-0.333333		-0.333333					0.111111		0.111111
		5	2697.5	34.6354	33.4067	7.2		1.03678			3634.99	2751.06	0.980531			0.742092	2751.06	6.22402		6.20736		-0.975977		-0.992644					0.952531		0.985341
		7	3763	38.2812	37.5007	5.57143		1.02081	1.10778	0.0519929	4509.98	3928.32	0.957917	0.97576	0.0115687	0.834371	3928.32	5.84226		5.85417		0.270836		0.282741					0.0733521		0.0799423
Fig4B	Aboav 1985 Fig1 Voronoi polygons	6	6561.5	55.4781	47.8609	7		1.15915			8341.66	6898.5	0.951149			0.786594	6323.62	6	6	6		-1	-1	-1					1	1	1
		5	4659.5	63.9085	44.6944	7.2		1.4299			8973.49	6791.38	0.686091			0.519252	6225.43	6.30265	6.34876	6.28598		-0.897354	-0.851239	-0.91402					0.805244	0.724607	0.835433
		6	4416	55.911	36.8368	6.5		1.5178			6470.38	5350.96	0.825272			0.682495	4905.05	6	6	6		-0.5	-0.5	-0.5					0.25	0.25	0.25
		5	2717	48.4068	33.2119	6		1.45752			5050.68	3822.49	0.710794			0.537948	3503.95	6.30817	6.34934	6.2915		0.30817	0.349344	0.291503					0.0949686	0.122041	0.084974
		5	2307.5	36.4265	28.0321	6.6		1.29946			3207.91	2427.83	0.950436			0.719315	2225.51	6.27656	6.2698	6.25989		-0.323442	-0.330196	-0.340109					0.104615	0.109029	0.115674
		5	2410	38.5631	30.0398	6.6		1.28373			3639.31	2754.32	0.874988			0.662214	2524.8	6.27341	6.28175	6.25675		-0.326587	-0.318251	-0.343253					0.106659	0.101284	0.117823
		5	3214.5	47.5237	35.3846	6.6		1.34306			5282.92	3998.26	0.803975			0.60847	3665.07	6.28528	6.30782	6.26861		-0.314721	-0.292183	-0.331388					0.0990494	0.0853708	0.109818
		6	4540	62.9883	29.1957	6.16667		2.15745			5777.35	4777.83	0.950223			0.785828	4379.67	6	6	6		-0.166667	-0.166667	-0.166667					0.0277778	0.0277778	0.0277778
		6	2448.5	40.1748	25.3997	5.57143		1.5817			3205.77	2651.15	0.92356			0.763778	2430.22	6	6	6		0.428571	0.428571	0.428571					0.183673	0.183673	0.183673
		5	3957.5	52.089	33.4465	6.4		1.55738			5473.27	4142.32	0.955383			0.72306	3797.12	6.32814	6.3204	6.31148		-0.0718571	-0.0796005	-0.0885238					0.00516345	0.00633624	0.00783647
		6	5258	55.1021	42.2637	6		1.30377			7316.19	6050.44	0.869028			0.71868	5546.24	6	6	6		0	0	0					0	0	0
		5	2523	49.5125	24.996	6.2		1.98082			3888.07	2942.6	0.857405			0.648907	2697.38	6.41283	6.42468	6.39616		0.212831	0.224683	0.196164					0.0452969	0.0504824	0.0384803
		7	4595	50.8736	37.4648	6.28571		1.3579			5987.77	5215.5	0.881027			0.767398	4780.88	5.79411	5.78902	5.80601		-0.491605	-0.496697	-0.479701					0.241676	0.246708	0.230113
		5	3304	45.0445	36.4446	6.8		1.23597			5157.33	3903.2	0.846484			0.640642	3577.94	6.26386	6.2779	6.24719		-0.536139	-0.522103	-0.552806					0.287445	0.272591	0.305594
		5	3594	50.585	39.3085	5.8		1.28687			6246.81	4727.75	0.760192			0.575334	4333.77	6.27404	6.30534	6.25737		0.474041	0.505336	0.457374					0.224715	0.255365	0.209191
		8	4846.5	48.6266	38.8715	5.625		1.25096			5938.21	5346.26	0.906521			0.816156	4900.74	5.66643	5.66389	5.68726		0.0414271	0.0388907	0.0622604					0.0017162	0.00151248	0.00387636
		5	3030.5	46.0318	37.92	7.2		1.21392			5483.73	4150.24	0.7302			0.552635	3804.38	6.25945	6.29674	6.24278		-0.940549	-0.903256	-0.957216					0.884633	0.815871	0.916262
		5	2070	37.9578	26.1797	6.8		1.4499			3121.87	2362.72	0.87611			0.663063	2165.83	6.30665	6.31476	6.28998		-0.493354	-0.485242	-0.51002					0.243398	0.23546	0.260121
		6	5936	57.9951	48.4919	6.33333		1.19598			8835.07	7306.55	0.812422			0.671868	6697.67	6	6	6		-0.333333	-0.333333	-0.333333					0.111111	0.111111	0.111111
		7	3166.5	48.2223	26.0977	6.14286		1.84776			3953.67	3443.76	0.91949			0.8009	3156.78	5.72413	5.72453	5.73603		-0.418728	-0.418324	-0.406823					0.175333	0.174995	0.165505
		7	4393	59.3055	33.9444	6.14286		1.74714			6324.31	5508.64	0.797474			0.694621	5049.59	5.7385	5.72148	5.75041		-0.404353	-0.421381	-0.392448					0.163501	0.177562	0.154016
		5	2287.5	39.5599	25.7175	6.2		1.53825			3196.2	2418.97	0.945651			0.715694	2217.39	6.32432	6.31852	6.30765		0.124316	0.118519	0.107649					0.0154544	0.0140467	0.0115883
		5	3307	47.2802	46.1756	6.2		1.02392			6858.7	5190.85	0.637083			0.482162	4758.27	6.22145	6.27737	6.20478		0.0214509	0.0773676	0.00478419					0.000460139	0.00598574	2.28885e-05
		5	1379	27.8407	21.4518	6		1.29783			1876.26	1420	0.971126			0.734974	1301.67	6.27623	6.26534	6.25957		0.276232	0.26534	0.259565					0.0763042	0.0704055	0.0673742
		6	2628.5	37.9766	33.4076	6.5		1.13677			3985.76	3296.2	0.797433			0.659472	3021.52	6	6	6		-0.5	-0.5	-0.5					0.25	0.25	0.25
		5	3027	44.3432	31.5059	7		1.40746			4389.02	3321.73	0.911272			0.689675	3044.92	6.29816	6.29924	6.28149		-0.701842	-0.700763	-0.718509					0.492582	0.491069	0.516255
		6	1804.5	29.333	24.6016	6		1.19232			2267.09	1874.87	0.962467			0.795954	1718.63	6	6	6		0	0	0					0	0	0
		5	1392.5	27.7726	23.3747	6.4		1.18815			2039.45	1543.51	0.902166			0.682783	1414.88	6.2543	6.2572	6.23763		-0.145703	-0.142803	-0.16237					0.0212295	0.0203928	0.0263641
		7	2580	40.3451	25.6806	5.57143		1.57103			3254.96	2835.16	0.910001			0.792635	2598.9	5.76366	5.76271	5.77557		0.192234	0.191282	0.204139					0.0369538	0.0365886	0.0416725
		6	3909	56.0706	35.8944	6		1.5621			6322.84	5228.95	0.74757			0.618235	4793.2	6	6	6		0	0	0					0	0	0
	Aboav 1985 Fig6 Voronoi polygons	5	5399.5	63.2263	38.0542	6.8		1.66148			7558.75	5720.66	0.943859			0.714338	5243.94	6.34896	6.34352	6.3323		-0.451037	-0.456476	-0.467704					0.203434	0.20837	0.218747
		5	4508.5	55.1229	46.4268	5.6		1.18731			8039.89	6084.81	0.740944			0.560766	5577.74	6.25413	6.28927	6.23746		0.654128	0.689273	0.637462					0.427884	0.475097	0.406357
		5	3117.5	43.669	33.9808	7.8		1.28511			4661.83	3528.2	0.883596			0.668729	3234.18	6.27369	6.2803	6.25702		-1.52631	-1.5197	-1.54298					2.32963	2.30948	2.38078
		7	2450.5	40.3561	27.6352	6.14286		1.46032			3503.66	3051.78	0.802975			0.699412	2797.46	5.77948	5.76324	5.79138		-0.363379	-0.379621	-0.351474					0.132044	0.144112	0.123534
		5	2239	43.9865	27.8635	6.6		1.57865			3850.39	2914.08	0.768339			0.581499	2671.24	6.3324	6.36206	6.31573		-0.267604	-0.237939	-0.284271					0.0716121	0.0566149	0.08081
		5	1639	34.1483	21.0117	6.2		1.6252			2254.14	1705.99	0.960731			0.727107	1563.83	6.34171	6.33289	6.32504		0.141708	0.132895	0.125041					0.020081	0.017661	0.0156352
		7	1950.5	28.4106	27.1954	6.14286		1.04469			2427.31	2114.25	0.922549			0.803564	1938.06	5.83885	5.83969	5.85076		-0.304003	-0.303162	-0.292098					0.0924176	0.0919074	0.0853212
		5	4064.5	58.7473	37.1156	7		1.58282			6850.07	5184.32	0.783999			0.593352	4752.29	6.33323	6.35976	6.31656		-0.666769	-0.640236	-0.683436					0.444582	0.409902	0.467085
		6	2254.5	35.6417	25.1154	6.16667		1.41912			2812.21	2325.68	0.969393			0.801682	2131.87	6	6	6		-0.166667	-0.166667	-0.166667					0.0277778	0.0277778	0.0277778
		5	2153	35.7688	28.9339	5.8		1.23623			3251.33	2460.69	0.874958			0.662191	2255.63	6.26391	6.27225	6.24725		0.463912	0.472254	0.447245					0.215214	0.223023	0.200028
		5	3270	56.7095	34.6235	6		1.63789			6168.45	4668.45	0.700447			0.530117	4279.41	6.34425	6.38749	6.32758		0.344245	0.387489	0.327578					0.118505	0.150148	0.107308
		7	4309.5	57.1443	30.3823	6.28571		1.88084			5454.35	4750.89	0.907094			0.790103	4354.98	5.7194	5.71804	5.73131		-0.56631	-0.567678	-0.554406					0.320707	0.322258	0.307366
		6	3242	42.5071	33.1639	6		1.28173			4428.7	3662.51	0.885186			0.732043	3357.3	6	6	6		0	0	0					0	0	0
		6	3588	46.4872	32.6321	6.33333		1.42458			4765.72	3941.22	0.910378			0.752876	3612.79	6	6	6		-0.333333	-0.333333	-0.333333					0.111111	0.111111	0.111111
		5	2335	35.3281	32.871	5.6		1.07475			3648.23	2761.08	0.845684			0.640036	2530.99	6.23162	6.24581	6.21495		0.631617	0.645813	0.61495					0.39894	0.417075	0.378163
		6	4866.5	56.1179	37.6704	6.66667		1.48971			6641.28	5492.29	0.88606			0.732765	5034.6	6	6	6		-0.666667	-0.666667	-0.666667					0.444444	0.444444	0.444444
		6	4855	64.7264	42.7661	6.33333		1.5135			8696.23	7191.73	0.675081			0.558288	6592.41	6	6	6		-0.333333	-0.333333	-0.333333					0.111111	0.111111	0.111111
		5	1753	38.4133	20.1518	6.6		1.9062			2431.9	1840.52	0.952446			0.720837	1687.15	6.39791	6.39075	6.38124		-0.202094	-0.20925	-0.218761					0.040842	0.0437855	0.0478562
		8	3996.5	44.2413	34.0847	6.625		1.29798			4737.37	4265.14	0.937016			0.843611	3909.71	5.65467	5.65976	5.67551		-0.970328	-0.965241	-0.949495					0.941537	0.93169	0.90154
		7	4687	50.6927	34.9568	6.28571		1.45015	1.43228	0.246381	5567.08	4849.08	0.966576	0.865865	0.090762	0.841913	4444.99	5.78093	5.78806	5.79284		-0.504784	-0.497654	-0.492879					0.254807	0.247659	0.24293
	Mombach et al. 1990 Fig1a epidermal tissue of Allium sativum (garlic)	5	3625	71.3445	21.8504	6.2		3.26513			4897.45	3706.52	0.978005			0.74018	3397.65	6.66969	6.65743	6.65303		0.469693	0.457426	0.453027					0.220612	0.209238	0.205233
		6	3592	80.7555	17.6795	5.83333		4.56774			4485.31	3709.32	0.968371			0.800837	3400.21	6	6	6		0.166667	0.166667	0.166667					0.0277778	0.0277778	0.0277778
		6	2635.5	55.6831	19.1668	5.83333		2.90519			3352.92	2772.84	0.950468			0.786031	2541.77	6	6	6		0.166667	0.166667	0.166667					0.0277778	0.0277778	0.0277778
		5	3863.5	78.5403	23.0281	5.8		3.41063			5681.98	4300.27	0.898431			0.679957	3941.92	6.69879	6.70244	6.68213		0.898793	0.90244	0.882127					0.807829	0.814398	0.778147
		6	3389	59.3968	24.0517	6		2.46954			4488.07	3711.61	0.913082			0.755113	3402.31	6	6	6		0	0	0					0	0	0
		6	4403.5	87.6106	19.8753	6.33333		4.40802			5470.4	4523.99	0.973367			0.804968	4146.99	6	6	6		-0.333333	-0.333333	-0.333333					0.111111	0.111111	0.111111
		5	3468	60.6162	24.5835	6.2		2.46572			4681.47	3543.06	0.978814			0.740793	3247.81	6.50981	6.49738	6.49314		0.309812	0.297382	0.293145					0.0959833	0.0884361	0.085934
		6	3766.5	64.0884	23.5712	5.83333		2.71893			4745.82	3924.76	0.959677			0.793646	3597.7	6	6	6		0.166667	0.166667	0.166667					0.0277778	0.0277778	0.0277778
		6	3356	72.0485	19.55	5.83333		3.68535			4425.08	3659.51	0.917063			0.758405	3354.55	6	6	6		0.166667	0.166667	0.166667					0.0277778	0.0277778	0.0277778
		5	2739	54.4112	21.8135	6.4		2.49438	3.23906	0.780877	3728.75	2822.02	0.970581	0.950786	0.0300305	0.734562	2586.85	6.51554	6.50476	6.49888		0.115542	0.104759	0.0988756					0.01335	0.0109745	0.00977638
	Mombach et al. 1990 Fig1b epidermal tissue of Allium cepa (onion)	6	1906.5	71.2877	12.0858	6.5		5.89848			2706.69	2238.42	0.851717			0.704365	2051.88	6	6	6		-0.5	-0.5	-0.5					0.25	0.25	0.25
		6	1714	45.5113	15.6452	6.33333		2.90897			2236.92	1849.92	0.926528			0.766233	1695.76	6	6	6		-0.333333	-0.333333	-0.333333					0.111111	0.111111	0.111111
		5	1099.5	32.7929	14.8784	6.4		2.20406			1532.8	1160.07	0.94779			0.717313	1063.4	6.45748	6.45125	6.44081		0.0574783	0.0512537	0.0408116					0.00330375	0.00262694	0.00166559
		6	1603	46.6235	14.5232	5.83333		3.21029			2127.24	1759.21	0.911203			0.753559	1612.61	6	6	6		0.166667	0.166667	0.166667					0.0277778	0.0277778	0.0277778
		6	1730	54.2229	13.2078	6		4.10538			2249.9	1860.65	0.929781			0.768923	1705.6	6	6	6		0	0	0					0	0	0
		6	1986	52.7455	16.2054	6		3.25482			2685.31	2220.73	0.8943			0.73958	2035.67	6	6	6		0	0	0					0	0	0
		5	1268.5	44.9679	12.6576	6.6		3.55264			1788.15	1353.32	0.937325			0.709392	1240.54	6.72719	6.72306	6.71053		0.127195	0.123063	0.110528					0.0161786	0.0151446	0.0122165
		6	1676	50.2782	13.7127	6.33333		3.66653			2165.97	1791.25	0.935661			0.773786	1641.98	6	6	6		-0.333333	-0.333333	-0.333333					0.111111	0.111111	0.111111
		6	1478.5	44.3206	14.6408	5.83333		3.0272			2038.54	1685.86	0.877			0.725273	1545.37	6	6	6		0.166667	0.166667	0.166667					0.0277778	0.0277778	0.0277778
		5	1076.5	34.4616	13.8883	6.2		2.48134	3.43097	1.02935	1503.61	1137.97	0.945983	0.915729	0.0319688	0.715945	1043.14	6.51293	6.50707	6.49627		0.312935	0.307072	0.296268					0.0979283	0.0942931	0.0877749
	Mombach et al. 1990 Fig1c epidermal tissue of Agave attenuat	6	8441	59.3965	55.5906	5.83333		1.06846			10373.2	8578.55	0.983966			0.813733	7863.67	6	6	6		0.166667	0.166667	0.166667					0.0277778	0.0277778	0.0277778
		5	5862.5	54.0122	46.4034	6.2		1.16397			7873.92	5959.19	0.983774			0.744547	5462.59	6.24946	6.23604	6.23279		0.049461	0.0360395	0.0327943					0.00244639	0.00129884	0.00107547
		7	9032.5	65.235	53.536	5.85714		1.21853			10971.8	9556.69	0.945149			0.82325	8760.3	5.81402	5.81809	5.82592		-0.0431228	-0.0390538	-0.031218					0.00185958	0.0015252	0.000974567
		6	8288	62.0647	52.9626	6		1.17186			10326.8	8540.16	0.970474			0.802575	7828.48	6	6	6		0	0	0					0	0	0
		6	8204.5	59.982	54.1948	6		1.10679			10212.4	8445.59	0.971454			0.803386	7741.79	6	6	6		0	0	0					0	0	0
		6	8016.5	58.2308	54.0498	6.33333		1.07736			9887.73	8177.09	0.980361			0.810752	7495.66	6	6	6		-0.333333	-0.333333	-0.333333					0.111111	0.111111	0.111111
		7	10604	65.6005	60.0783	6.14286		1.09192			12381.5	10784.7	0.983249			0.856436	9885.93	5.83211	5.84162	5.84401		-0.31075	-0.301238	-0.298845					0.0965655	0.0907444	0.0893084
		6	8256	57.3519	55.7395	6.16667		1.02893			10042.9	8305.44	0.994047			0.82207	7613.32	6	6	6		-0.166667	-0.166667	-0.166667					0.0277778	0.0277778	0.0277778
		5	4986.5	50.0491	43.2218	6.4		1.15796			6795.93	5143.34	0.969507			0.733749	4714.73	6.24826	6.23769	6.23159		-0.151741	-0.162309	-0.168408					0.0230254	0.0263443	0.0283612
		6	7421.5	58.8592	49.3117	6		1.19362	1.12794	0.0617276	9118.31	7540.78	0.984181	0.976616	0.0134554	0.813912	6912.39	6	6	6		0	0	0					0	0	0
	onion images were taken by the author of this study	6	4559	52.9307	34.4296	6.16667		1.53736			5725.19	4734.7	0.962891			0.796305	4340.14	6	6	6		-0.166667	-0.166667	-0.166667					0.0277778	0.0277778	0.0277778
		6	5386	61.1229	35.8952	5.83333		1.70282			6892.7	5700.22	0.944876			0.781406	5225.2	6	6	6		0.166667	0.166667	0.166667					0.0277778	0.0277778	0.0277778
		6	3325.5	39.2147	32.7597	6.16667		1.19704			4035.88	3337.65	0.996361			0.823984	3059.51	6	6	6		-0.166667	-0.166667	-0.166667					0.0277778	0.0277778	0.0277778
		5	4117	54.4443	36.4606	6.6		1.49324			6236.28	4719.78	0.872286			0.66017	4326.47	6.31531	6.32419	6.29865		-0.284686	-0.27581	-0.301352					0.081046	0.076071	0.0908133
		5	3853	59.0586	29.7035	6.4		1.98827			5511.12	4170.97	0.923767			0.699131	3823.39	6.41432	6.4129	6.39765		0.0143211	0.0129011	-0.00234558					0.000205094	0.000166438	5.50173e-06
		6	4765.5	63.1859	30.3554	6		2.08154			6025.67	4983.19	0.956315			0.790866	4567.93	6	6	6		0	0	0					0	0	0
		6	5791.5	65.7234	35.0837	5.83333		1.87333			7243.93	5990.69	0.966751			0.799496	5491.46	6	6	6		0.166667	0.166667	0.166667					0.0277778	0.0277778	0.0277778
		6	6966.5	76.0651	36.362	6.33333		2.09188			8689.27	7185.97	0.969459			0.801736	6587.14	6	6	6		-0.333333	-0.333333	-0.333333					0.111111	0.111111	0.111111
		5	4514.5	64.5178	33.8682	6.2		1.90497			6864.71	5195.4	0.868942			0.657639	4762.45	6.39766	6.4072	6.38099		0.19766	0.207205	0.180993					0.0390694	0.0429338	0.0327586
		5	4154.5	54.6153	32.7963	6.8		1.66529			5627.16	4258.78	0.975513			0.738294	3903.89	6.34972	6.33796	6.33306		-0.450275	-0.462045	-0.466942					0.202748	0.213485	0.218035
		6	7972.5	80.7957	38.8842	5.83333		2.07785			9869.88	8162.32	0.976744			0.807761	7482.13	6	6	6		0.166667	0.166667	0.166667					0.0277778	0.0277778	0.0277778
		6	4647	58.9893	30.9119	5.83333		1.9083			5728.61	4737.52	0.980893			0.811192	4342.73	6	6	6		0.166667	0.166667	0.166667					0.0277778	0.0277778	0.0277778
		6	5628	64.1878	34.7581	6.16667		1.8467			7009.03	5796.42	0.970943			0.802964	5313.39	6	6	6		-0.166667	-0.166667	-0.166667					0.0277778	0.0277778	0.0277778
		6	7336.5	96.7989	31.1426	6		3.10825			9470.54	7832.08	0.936725			0.774665	7179.4	6	6	6		0	0	0					0	0	0
		5	3317.5	59.4457	25.9185	6.4		2.29356			4840.4	3663.34	0.905594			0.685378	3358.06	6.47538	6.47759	6.45871		0.0753784	0.0775929	0.0587117					0.0056819	0.00602066	0.00344706
		5	3183.5	50.8384	28.9377	6.4		1.75682			4621.73	3497.85	0.91013			0.688811	3206.36	6.36803	6.36934	6.35136		-0.0319687	-0.0306615	-0.0486354					0.001022	0.000940125	0.0023654
		6	4292	59.3579	28.2575	5.83333		2.1006			5269.42	4357.77	0.984907			0.814511	3994.62	6	6	6		0.166667	0.166667	0.166667					0.0277778	0.0277778	0.0277778
		6	5771.5	69.5854	33.1003	6.5		2.10226			7236.03	5984.15	0.964465			0.797606	5485.47	6	6	6		-0.5	-0.5	-0.5					0.25	0.25	0.25
		5	3711	61.2019	28.2026	6.4		2.17008			5422.55	4103.93	0.904255			0.684364	3761.94	6.45068	6.45317	6.43402		0.050683	0.0531655	0.0340164					0.00256877	0.00282657	0.00115711
		6	5434.5	63.1603	34.0175	6		1.8567	1.93784	0.381169	6749.9	5582.12	0.973555	0.947269	0.0375302	0.805124	5116.94	6	6	6		0	0	0					0	0	0
	P. haitanensis thalli 211cells	7	9391	68.7293	60.1256	5.85714		1.1431			12982.3	11307.9	0.830479			0.723369	10365.6	5.8248	5.81248	5.8367		-0.0323469	-0.0446594	-0.0204422					0.00104632	0.00199447	0.000417882
		6	8397.5	73.429	53.4587	6.16667		1.37356			12332.1	10198.5	0.823402			0.680948	9348.66	6	6	6		-0.166667	-0.166667	-0.166667					0.0277778	0.0277778	0.0277778
		6	9534.5	75.9463	61.0564	6.16667		1.24387			14567.6	12047.3	0.791422			0.6545	11043.4	6	6	6		-0.166667	-0.166667	-0.166667					0.0277778	0.0277778	0.0277778
		6	11432	95.9214	57.4525	6		1.66958			17313.1	14317.8	0.798447			0.66031	13124.6	6	6	6		0	0	0					0	0	0
		4	5460.5	54.4695	50.2215	6.5		1.08458			8593.96	5471.08	0.998065			0.635388	5015.16	6.58396	6.54326	6.54229		0.0839591	0.0432597	0.0422924					0.00704913	0.0018714	0.00178865
		7	14133.5	82.7188	65.47	6.28571		1.26346			17013.6	14819.3	0.953723			0.830718	13584.4	5.8076	5.81289	5.81951		-0.478114	-0.47282	-0.466209					0.228593	0.223559	0.217351
		8	9825	68.5257	55.7051	5.875		1.23015			11992.2	10796.8	0.909995			0.819284	9897.03	5.67163	5.66996	5.69246		-0.203371	-0.205039	-0.182538					0.0413597	0.0420409	0.03332
		6	9976	67.1763	61.3941	5.83333		1.09418			12956.7	10715.1	0.931026			0.769952	9822.14	6	6	6		0.166667	0.166667	0.166667					0.0277778	0.0277778	0.0277778
		7	9499.5	72.8606	53.3889	6.14286		1.36471			12220.6	10644.5	0.892433			0.777332	9757.46	5.79314	5.78967	5.80504		-0.349721	-0.353183	-0.337816					0.122305	0.124738	0.11412
		5	7130.5	68.4665	51.7014	6		1.32427			11120.7	8416.41	0.847214			0.641194	7715.04	6.28152	6.29541	6.26485		0.28152	0.295411	0.264854					0.0792537	0.0872676	0.0701475
		5	7368	76.8372	48.2642	6.4		1.59201			11650.6	8817.45	0.835615			0.632416	8082.67	6.33507	6.35128	6.3184		-0.0649312	-0.0487209	-0.0815979					0.00421606	0.00237373	0.00665821
		5	8417	67.1769	54.7475	6.2		1.22703			11554	8744.41	0.962558			0.72849	8015.71	6.26207	6.25289	6.24541		0.0620729	0.0528946	0.0454062					0.00385304	0.00279784	0.00206173
		7	10990.5	73.4374	63.9398	6.14286		1.14854			14751.6	12849	0.855357			0.745039	11778.3	5.82402	5.81526	5.83592		-0.318839	-0.327597	-0.306934					0.101658	0.10732	0.0942085
		5	10066.5	73.6254	59.2326	6.2		1.24299			13700.6	10368.9	0.970831			0.734751	9504.87	6.26526	6.25443	6.2486		0.065264	0.0544311	0.0485973					0.00425939	0.00296275	0.0023617
		8	12626	80.068	63.3575	5.875		1.26375			15937	14348.3	0.879962			0.792244	13152.7	5.66323	5.65405	5.68406		-0.211771	-0.220947	-0.190938					0.044847	0.0488177	0.0364572
		5	6413	58.3647	48.968	6		1.1919			8978.68	6795.3	0.94374			0.714248	6229.03	6.25505	6.24963	6.23838		0.255046	0.249631	0.238379					0.0650483	0.0623156	0.0568245
		6	13399.5	79.9068	66.6529	6		1.19885			16732.2	13837.4	0.968352			0.800821	12684.3	6	6	6		0	0	0					0	0	0
		6	14062	85.3419	73.7882	6.16667		1.15658			19783.3	16360.7	0.8595			0.710801	14997.3	6	6	6		-0.166667	-0.166667	-0.166667					0.0277778	0.0277778	0.0277778
		5	12148.5	105.069	55.6494	6		1.88806			18369	13902.1	0.873859			0.66136	12743.6	6.39428	6.40284	6.37761		0.394278	0.402839	0.377611					0.155455	0.162279	0.14259
		8	12155.5	77.5998	70.1287	5.875		1.10653			17096.5	15392.2	0.789717			0.710995	14109.5	5.70253	5.6708	5.72337		-0.172467	-0.204204	-0.151634					0.0297448	0.0416994	0.0229927
		4	9317.5	89.1561	59.7594	7		1.49192			16738.1	10655.8	0.874404			0.556663	9767.84	6.78763	6.80876	6.74596		-0.212374	-0.191243	-0.254041					0.0451029	0.036574	0.0645369
		4	10170	98.6363	53.6639	7		1.83804			16629.1	10586.4	0.960666			0.611579	9704.21	6.96069	6.93869	6.91902		-0.0393144	-0.0613139	-0.080981					0.00154562	0.00375939	0.00655793
		5	10727	84.013	61.8424	6.4		1.3585			16322.3	12353.2	0.868359			0.657197	11323.8	6.28837	6.29803	6.2717		-0.111633	-0.101971	-0.128299					0.0124619	0.0103981	0.0164607
		7	13423.5	75.6263	71.3743	5.57143		1.05957			16957.6	14770.5	0.908803			0.791592	13539.6	5.83673	5.8356	5.84863		0.265299	0.264176	0.277204					0.0703835	0.0697887	0.0768419
		6	12807.5	86.589	65.7501	6.5		1.31694			17885.8	14791.4	0.865872			0.71607	13558.8	6	6	6		-0.5	-0.5	-0.5					0.25	0.25	0.25
		7	14539.5	113.615	49.3794	6.28571		2.30086			17625.1	15351.9	0.947082			0.824933	14072.6	5.6594	5.66375	5.67131		-0.626313	-0.621968	-0.614408					0.392268	0.386844	0.377498
		6	12002.5	82.7451	63.9427	6.16667		1.29405			16622	13746.3	0.873146			0.722086	12600.7	6	6	6		-0.166667	-0.166667	-0.166667					0.0277778	0.0277778	0.0277778
		4	9410.5	88.2136	59.5569	6.5		1.48116			16505.1	10507.5	0.895601			0.570157	9631.84	6.78225	6.79278	6.74058		0.282249	0.292781	0.240582					0.0796643	0.0857209	0.0578797
		7	14408.5	83.7213	67.2997	5.85714		1.24401			17701	15418.1	0.93452			0.813991	14133.2	5.81038	5.81293	5.82228		-0.046763	-0.0442125	-0.0348582					0.00218678	0.00195475	0.0012151
		4	7200	71.3704	54.1298	6.75		1.3185			12136.8	7726.54	0.931854			0.593236	7082.66	6.70092	6.69333	6.65925		-0.0490812	-0.0566747	-0.0907479					0.00240897	0.00321202	0.00823518
		8	9962.5	77.4275	50.0709	5.625		1.54636			12179.5	10965.4	0.908538			0.817971	10051.6	5.59258	5.59054	5.61341		-0.032423	-0.0344552	-0.0115896					0.00105125	0.00118716	0.000134319
		8	13380.5	86.0553	60.7622	5.875		1.41627			16427.1	14789.6	0.904725			0.814538	13557.1	5.6251	5.62211	5.64593		-0.2499	-0.252885	-0.229066					0.0624498	0.0639509	0.0524714
		4	5836	70.6729	46.0058	6.5		1.53617			10214.5	6502.73	0.897469			0.571346	5960.84	6.80975	6.81935	6.76809		0.309754	0.319352	0.268087					0.0959473	0.101986	0.0718706
		5	6404	59.9544	51.9621	6.4		1.15381			9787.18	7407.2	0.864564			0.654325	6789.93	6.24743	6.25785	6.23076		-0.152571	-0.142151	-0.169238					0.023278	0.0202069	0.0286415
		5	12830	104.621	62.2255	7		1.68132			20452.1	15478.7	0.82888			0.627319	14188.8	6.35293	6.37049	6.33626		-0.647069	-0.629511	-0.663735					0.418698	0.396285	0.440545
		7	15306	85.8347	68.7718	6.28571		1.24811			18544.9	16153.1	0.947561			0.82535	14807	5.80979	5.81421	5.8217		-0.47592	-0.471507	-0.464015					0.2265	0.222319	0.21531
		5	12049	80.245	64.3201	6.2		1.24759			16214.9	12271.9	0.981839			0.743082	11249.2	6.26618	6.25315	6.24952		0.0661842	0.0531497	0.0495176					0.00438035	0.00282489	0.00245199
		6	8505.5	84.3984	44.2059	5.83333		1.90921			11721	9693.19	0.877472			0.725664	8885.42	6	6	6		0.166667	0.166667	0.166667					0.0277778	0.0277778	0.0277778
		4	6394.5	72.7228	48.4737	6.75		1.50025			11074.6	7050.28	0.906985			0.577404	6462.76	6.79179	6.79663	6.75013		0.0417939	0.0466348	0.000127198					0.00174673	0.0021748	1.61793e-08
		4	7464	68.7888	57.9224	7		1.1876			12517.4	7968.82	0.93665			0.59629	7304.75	6.63547	6.62548	6.5938		-0.364532	-0.374524	-0.406199					0.132884	0.140268	0.164998
		5	11238	74.044	67.2637	6.6		1.1008			15646.6	11841.8	0.949012			0.718238	10855	6.23683	6.23036	6.22016		-0.363173	-0.369642	-0.37984					0.131895	0.136635	0.144278
		6	7523	63.2052	50.4256	6		1.25343			10012.8	8280.48	0.908522			0.751342	7590.44	6	6	6		0	0	0					0	0	0
		6	7668	65.5806	52.5864	6.16667		1.2471			10834.3	8959.86	0.855817			0.707755	8213.2	6	6	6		-0.166667	-0.166667	-0.166667					0.0277778	0.0277778	0.0277778
		6	9369.5	71.196	55.1609	5.83333		1.2907			12337.8	10203.3	0.918286			0.759416	9352.98	6	6	6		0.166667	0.166667	0.166667					0.0277778	0.0277778	0.0277778
		6	9042	76.3698	63.3448	5.83333		1.20562			15197.9	12568.5	0.719415			0.594952	11521.2	6	6	6		0.166667	0.166667	0.166667					0.0277778	0.0277778	0.0277778
		5	8820.5	78.1753	48.8445	6		1.60049			11996	9078.87	0.971541			0.735288	8322.3	6.33677	6.32579	6.3201		0.336765	0.325791	0.320099					0.113411	0.106139	0.102463
		6	7170.5	58.4799	50.9042	6.66667		1.14882			9352.12	7734.14	0.927123			0.766725	7089.63	6	6	6		-0.666667	-0.666667	-0.666667					0.444444	0.444444	0.444444
		6	13989	107.268	53.7411	6		1.99601			18110.3	14977.1	0.934025			0.772433	13729	6	6	6		0	0	0					0	0	0
		5	7067	67.1175	52.7053	6.6		1.27345			11113.2	8410.79	0.84023			0.635909	7709.89	6.27136	6.28664	6.25469		-0.328643	-0.313356	-0.34531					0.108007	0.0981921	0.119239
		6	6570	57.2899	50.0125	6		1.14551			9001.32	7444.03	0.882586			0.729893	6823.69	6	6	6		0	0	0					0	0	0
		5	8438	74.3528	48.4417	6.4		1.53489			11315.3	8563.72	0.985319			0.745716	7850.08	6.32365	6.30991	6.30698		-0.0763546	-0.0900851	-0.0930212					0.00583002	0.00811532	0.00865295
		7	11714	77.0472	65.3292	6.14286		1.17937			15813	13773.5	0.850472			0.740784	12625.7	5.81961	5.81016	5.83152		-0.323243	-0.332699	-0.311338					0.104486	0.110689	0.0969316
		4	6465	71.6667	47.5612	6.5		1.50683			10708.3	6817.1	0.94835			0.603738	6249.01	6.79508	6.77924	6.75342		0.295083	0.279241	0.253416					0.087074	0.0779757	0.0642199
		8	12556.5	76.4176	65.5508	5.875		1.16578			15737	14168.3	0.886241			0.797897	12987.6	5.68772	5.68012	5.70856		-0.187277	-0.194884	-0.166444					0.0350729	0.0379797	0.0277037
		4	6689	71.598	50.97	6.75		1.40471			11464.8	7298.71	0.916464			0.583439	6690.48	6.74402	6.74412	6.70235		-0.00597892	-0.0058775	-0.0476456					3.57474e-05	3.45451e-05	0.0022701
		9	17904	99.4869	68.4834	5.66667		1.45272			21404.3	19707.5	0.908487			0.836467	18065.2	5.48798	5.48526	5.51576		-0.178683	-0.18141	-0.150905					0.0319277	0.0329095	0.0227724
		7	13500.5	80.7775	70.9057	6		1.13922			17993.8	15673	0.861384			0.750288	14366.9	5.82535	5.81745	5.83725		-0.174651	-0.182549	-0.162746					0.030503	0.033324	0.0264864
		4	8765	74.5928	62.7689	6.75		1.18837			14709.3	9364.21	0.93601			0.595883	8583.86	6.63585	6.62618	6.59419		-0.114147	-0.123819	-0.155814					0.0130295	0.0153311	0.0242779
		6	10535.5	82.581	57.4466	6.33333		1.43753			14903.7	12325.3	0.854789			0.706905	11298.2	6	6	6		-0.333333	-0.333333	-0.333333					0.111111	0.111111	0.111111
		4	5643	72.1865	43.9725	7		1.64163			9972.11	6348.45	0.888879			0.565878	5819.41	6.86248	6.87637	6.82081		-0.13752	-0.123626	-0.179186					0.0189117	0.0152834	0.0321078
		7	12499	81.2514	59.9134	5.85714		1.35615			15293.4	13321	0.938294			0.817279	12210.9	5.79436	5.79745	5.80626		-0.0627829	-0.0596933	-0.0508782					0.0039417	0.00356329	0.00258859
		5	10416.5	76.9578	65.8585	6.4		1.16853			15922.6	12050.7	0.864393			0.654195	11046.4	6.25037	6.26083	6.23371		-0.149627	-0.139172	-0.166294					0.0223883	0.0193689	0.0276536
		6	10966.5	82.2073	54.3768	5.66667		1.51181			14043.4	11613.8	0.944262			0.780899	10646	6	6	6		0.333333	0.333333	0.333333					0.111111	0.111111	0.111111
		6	6788.5	67.2801	43.6852	6.33333		1.54011			9233.59	7636.12	0.888999			0.735196	6999.78	6	6	6		-0.333333	-0.333333	-0.333333					0.111111	0.111111	0.111111
		5	6375	65.5658	47.7008	6.8		1.37452			9825.47	7436.18	0.857296			0.648824	6816.49	6.29157	6.30345	6.2749		-0.508429	-0.496555	-0.525096					0.2585	0.246566	0.275725
		5	10579	79.226	66.4461	6.4		1.19233			16538.2	12516.5	0.845203			0.639672	11473.5	6.25513	6.26943	6.23847		-0.144867	-0.130574	-0.161533					0.0209863	0.0170495	0.026093
		7	8053.5	59.4004	53.0587	6		1.11952			9901.39	8624.37	0.933807			0.813371	7905.67	5.82816	5.83061	5.84007		-0.171837	-0.169388	-0.159932					0.0295278	0.0286923	0.0255782
		7	11924.5	75.3301	67.5456	6.14286		1.11525			15985.1	13923.5	0.856432			0.745975	12763.2	5.82877	5.82017	5.84068		-0.314083	-0.322688	-0.302178					0.0986481	0.104127	0.0913117
		7	8968.5	88.1826	40.3349	5.85714		2.18626			11174.1	9732.96	0.921456			0.802613	8921.88	5.67577	5.67646	5.68768		-0.181371	-0.180687	-0.169466					0.0328954	0.0326477	0.0287188
		5	6813	57.5245	53.1053	6.4		1.08322			9597.1	7263.34	0.937998			0.709902	6658.06	6.23331	6.22904	6.21664		-0.16669	-0.170956	-0.183357					0.0277856	0.0292261	0.0336197
		6	10753	82.6522	54.5811	6.16667		1.5143			14172.5	11720.6	0.917448			0.758723	10743.8	6	6	6		-0.166667	-0.166667	-0.166667					0.0277778	0.0277778	0.0277778
		6	11615	73.8507	67.9331	6.66667		1.08711			15761.1	13034.3	0.89111			0.736942	11948.1	6	6	6		-0.666667	-0.666667	-0.666667					0.444444	0.444444	0.444444
		6	12009	93.0933	53.5341	6.16667		1.73895			15656.6	12947.9	0.927484			0.767023	11868.9	6	6	6		-0.166667	-0.166667	-0.166667					0.0277778	0.0277778	0.0277778
		5	11771	81.5347	73.0756	6.6		1.11576			18718.2	14166.5	0.830906			0.628852	12985.9	6.23982	6.25697	6.22315		-0.360182	-0.34303	-0.376848					0.129731	0.117669	0.142015
		7	11942.5	82.6147	63.3052	6		1.30502			16430.4	14311.3	0.834482			0.726856	13118.7	5.80166	5.78992	5.81357		-0.198336	-0.210077	-0.186432					0.0393373	0.0441324	0.0347568
		4	5608	62.717	47.8461	6.75		1.31081			9427.17	6001.52	0.934429			0.594876	5501.4	6.69707	6.68819	6.6554		-0.0529295	-0.061811	-0.0945962					0.00280154	0.00382059	0.00894844
		6	9719	70.3523	58.1231	6		1.2104			12846.3	10623.8	0.914834			0.756561	9738.47	6	6	6		0	0	0					0	0	0
		7	11372	90.1847	53.3318	6		1.69101			15110.1	13161.3	0.864046			0.752607	12064.6	5.74652	5.739	5.75843		-0.253478	-0.260995	-0.241573					0.064251	0.0681184	0.0583575
		4	9040	85.4667	54.0608	6.5		1.58094			14515.4	9240.79	0.978271			0.622787	8470.72	6.83213	6.80133	6.79047		0.332135	0.301333	0.290468					0.110314	0.0908013	0.0843718
		4	6661	85.4667	54.0608	6.75		1.58094			14515.4	9240.79	0.720826			0.458892	8470.72	6.83213	6.93006	6.79047		0.0821349	0.180055	0.0404682					0.00674614	0.0324199	0.00163768
		7	12355.5	87.9447	62.282	5.57143		1.41204			17207.7	14988.3	0.824341			0.718023	13739.3	5.78638	5.77319	5.79828		0.214946	0.201757	0.226851					0.046202	0.0407059	0.0514615
		6	9432.5	97.4911	39.6499	6.16667		2.4588			12143.9	10042.9	0.939221			0.776729	9205.99	6	6	6		-0.166667	-0.166667	-0.166667					0.0277778	0.0277778	0.0277778
		8	12861	87.6204	54.7895	6		1.59922			15081.8	13578.4	0.947168			0.852751	12446.8	5.57936	5.58699	5.60019		-0.420638	-0.413013	-0.399805					0.176937	0.17058	0.159844
		6	9733.5	66.8999	63.0603	5.83333		1.06089			13253.5	10960.6	0.888047			0.734409	10047.2	6	6	6		0.166667	0.166667	0.166667					0.0277778	0.0277778	0.0277778
		7	12507.5	92.6144	56.3293	5.85714		1.64416			16389.4	14275.6	0.876146			0.763146	13086	5.75322	5.74743	5.76512		-0.103928	-0.109716	-0.092023					0.010801	0.0120377	0.00846823
		5	7926	83.8717	50.9806	6.4		1.64517			13432.9	10166.4	0.779628			0.590043	9319.19	6.3457	6.37311	6.32903		-0.0542997	-0.0268919	-0.0709664					0.00294846	0.000723173	0.00503622
		7	11254.5	101.243	46.5444	5.71429		2.1752			14804.1	12894.8	0.872794			0.760226	11820.2	5.67735	5.67109	5.68926		-0.0369331	-0.0432007	-0.0250283					0.00136405	0.0018663	0.000626418
		4	6956	88.2886	43.3226	7		2.03793			12016.3	7649.79	0.909306			0.578882	7012.31	7.06063	7.06431	7.01897		0.0606337	0.0643139	0.018967					0.00367644	0.00413628	0.000359747
		7	8094.5	78.2084	56.6939	5.85714		1.37948			13929.6	12133.1	0.667143			0.581099	11122	5.79103	5.75538	5.80293		-0.0661169	-0.101763	-0.0542121					0.00437144	0.0103557	0.00293895
		4	5997	78.9849	41.4211	7		1.90688			10278.2	6543.28	0.916513			0.58347	5998.01	6.99511	6.99518	6.95344		-0.00489389	-0.0048169	-0.0465606					2.39501e-05	2.32025e-05	0.00216788
		4	7280	70.9662	53.5926	6.75		1.32418			11948.3	7606.52	0.957073			0.609292	6972.65	6.70376	6.68355	6.66209		-0.0462439	-0.0664473	-0.0879106					0.0021385	0.00441524	0.00772827
		5	8461.5	90.9278	47.8192	6.4		1.90149			13660	10338.2	0.818468			0.619438	9476.7	6.39696	6.4166	6.3803		-0.0030354	0.0166044	-0.0197021					9.21363e-06	0.000275705	0.000388171
		7	11180.5	109.269	50.0634	6.28571		2.1826			17185.6	14969.1	0.746903			0.650573	13721.7	5.67629	5.65204	5.6882		-0.609419	-0.633671	-0.597515					0.371392	0.401539	0.357024
		8	8115	62.439	53.1102	5.75		1.17565			10418	9379.49	0.865185			0.77894	8597.87	5.68525	5.67238	5.70609		-0.0647457	-0.0776161	-0.0439124					0.00419201	0.00602425	0.0019283
		8	11731.5	75.0052	62.2852	5.5		1.20422			14676.6	13213.6	0.887835			0.799332	12112.5	5.67811	5.6709	5.69894		0.178111	0.170904	0.198945					0.0317237	0.029208	0.039579
		4	8087	95.9656	55.8932	6.75		1.71695			16850.9	10727.6	0.753847			0.479914	9833.67	6.90014	6.98155	6.85847		0.15014	0.23155	0.108474					0.0225422	0.0536156	0.0117666
		8	12679	97.552	70.328	6		1.3871			21553.3	19404.8	0.653395			0.588262	17787.7	5.63239	5.56657	5.65322		-0.367608	-0.433426	-0.346775					0.135136	0.187858	0.120253
		4	4728	89.388	43.6077	6.5		2.04982			12245.9	7796	0.606465			0.386087	7146.33	7.06658	7.22168	7.02491		0.566577	0.721678	0.524911					0.32101	0.52082	0.275531
		7	11741.5	100.016	48.7362	6		2.0522			15313.4	13338.4	0.880278			0.766746	12226.9	5.69492	5.68973	5.70683		-0.305076	-0.310275	-0.293171					0.0930715	0.0962703	0.0859495
		8	17541.5	91.8627	85.9485	5.875		1.06881			24804.3	22331.7	0.785497			0.707196	20470.8	5.71196	5.67917	5.7328		-0.163036	-0.195829	-0.142203					0.0265807	0.0383488	0.0202216
		8	13830	81.033	65.596	5.75		1.23533			16698.9	15034.3	0.919895			0.828196	13781.5	5.67033	5.67114	5.69117		-0.0796669	-0.0788599	-0.0588335					0.00634681	0.00621888	0.00346139
		5	8797	81.7755	69.5499	6.8		1.17578			17867.7	13522.8	0.650532			0.49234	12395.9	6.25182	6.30505	6.23516		-0.548177	-0.49495	-0.564844					0.300498	0.244976	0.319048
		6	11817.5	71.2124	67.8165	6.33333		1.05007			15171.9	12547.1	0.941851			0.778905	11501.5	6	6	6		-0.333333	-0.333333	-0.333333					0.111111	0.111111	0.111111
		4	5950.5	83.5842	65.345	6.5		1.27912			17158.8	10923.6	0.544737			0.346791	10013.3	6.68123	6.86719	6.63956		0.181228	0.367192	0.139561					0.0328435	0.13483	0.0194773
		5	10890.5	86.4682	58.1039	6.8		1.48816			15783.8	11945.6	0.911674			0.689979	10950.1	6.3143	6.3153	6.29763		-0.485701	-0.484702	-0.502367					0.235905	0.234936	0.252373
		4	6108	62.5506	51.9711	6.5		1.20357			10212.8	6501.65	0.939454			0.598075	5959.85	6.64345	6.63206	6.60178		0.14345	0.132056	0.101783					0.0205778	0.0174388	0.0103598
		4	8097.5	80.9632	52.6287	6.75		1.53839			13386.3	8521.98	0.95019			0.60491	7811.82	6.81086	6.7941	6.76919		0.0608595	0.0440979	0.0191928					0.00370388	0.00194463	0.000368365
		8	17505	84.9847	78.8055	6		1.07841			21040.1	18942.7	0.924102			0.831984	17364.2	5.70956	5.71142	5.7304		-0.290436	-0.288577	-0.269603					0.0843532	0.0832769	0.0726857
		5	8601.5	71.7846	52.9707	6.8		1.35518			11945.8	9040.93	0.951395			0.720041	8287.52	6.2877	6.28076	6.27104		-0.512298	-0.519244	-0.528965					0.262449	0.269614	0.279803
		5	7542.5	65.1561	52.3335	6.8		1.24502			10712.4	8107.39	0.930324			0.704094	7431.78	6.26567	6.26294	6.249		-0.53433	-0.537061	-0.550997					0.285508	0.288435	0.303597
		5	9322.5	72.0516	56.5184	6.8		1.27483			12793.3	9682.32	0.962838			0.728701	8875.46	6.27163	6.2624	6.25497		-0.528366	-0.537601	-0.545033					0.279171	0.289014	0.297061
		4	8563	82.4193	57.3639	6.5		1.43678			14853.1	9455.78	0.905583			0.576512	8667.8	6.76006	6.7656	6.71839		0.260058	0.265599	0.218391					0.0676299	0.0705429	0.0476946
		9	17624.5	102.752	67.1144	5.88889		1.531			21664.9	19947.4	0.883549			0.813506	18285.1	5.46189	5.45085	5.48967		-0.426999	-0.438038	-0.399221					0.182328	0.191877	0.159378
		4	6681.5	74.7889	45.1459	7		1.6566			10607.3	6752.83	0.989438			0.629896	6190.09	6.86997	6.83358	6.8283		-0.130032	-0.166417	-0.171699					0.0169083	0.0276948	0.0294804
		4	8659	80.4228	54.1121	6.5		1.48622			13671.7	8703.7	0.994864			0.63335	7978.39	6.78478	6.74568	6.74311		0.284779	0.24568	0.243112					0.081099	0.0603587	0.0591035
		4	6698	80.4228	54.1121	6.75		1.48622			13671.7	8703.7	0.769558			0.489916	7978.39	6.78478	6.85833	6.74311		0.0347789	0.108333	-0.00688781					0.00120957	0.0117361	4.74419e-05
		4	6964.5	97.0876	36.4886	6		2.66077			11129.4	7085.17	0.982968			0.625777	6494.74	7.37205	7.3389	7.33038		1.37205	1.3389	1.33038					1.88252	1.79266	1.76992
		4	6474	68.4266	49.689	7		1.3771			10681.6	6800.09	0.952046			0.606092	6233.41	6.73022	6.71253	6.68855		-0.269784	-0.287474	-0.311451					0.0727835	0.0826414	0.0970017
		6	8183	62.6165	52.9116	6		1.18342			10408.5	8607.79	0.950651			0.786182	7890.47	6	6	6		0	0	0					0	0	0
		4	7699.5	89.9389	46.001	6.75		1.95515			12997.6	8274.55	0.930504			0.592377	7585	7.01924	7.01232	6.97758		0.269242	0.262324	0.227576					0.0724915	0.0688138	0.0517907
		9	25350.5	164.642	57.2194	5.77778		2.87737			29596	27249.8	0.9303			0.856551	24979	5.0131	5.01764	5.04088		-0.76468	-0.760135	-0.736902					0.584735	0.577806	0.543025
		10	24202	148.879	57.7962	5.8		2.57593			27032.3	25288.4	0.957038			0.895299	23181.1	4.9363	4.95244	4.96963		-0.863705	-0.847556	-0.830372					0.745986	0.718352	0.689517
		9	16299.5	84.4044	69.5174	6.33333		1.21415			18433.5	16972.2	0.960363			0.88423	15557.9	5.56751	5.58207	5.59528		-0.765827	-0.751262	-0.738049					0.586491	0.564394	0.544717
		9	17196.5	102.11	61.7611	6.11111		1.6533			19812.2	18241.6	0.94271			0.867977	16721.4	5.42112	5.4298	5.4489		-0.689989	-0.681308	-0.662211					0.476085	0.464181	0.438524
		9	14714	90.1836	59.4135	5.55556		1.5179			16833	15498.6	0.949375			0.874114	14207.1	5.46626	5.47716	5.49403		-0.0892987	-0.0783959	-0.0615209					0.00797426	0.00614591	0.00378482
		5	10989.5	96.876	79.4726	6.4		1.21899			24187.1	18305.4	0.600342			0.454355	16780	6.26046	6.32373	6.2438		-0.139536	-0.076271	-0.156203					0.0194703	0.00581726	0.0243993
		5	12658	89.853	63.1853	6		1.42205			17836	13498.8	0.937714			0.709687	12373.9	6.30108	6.29687	6.28441		0.301078	0.296868	0.284411					0.0906477	0.0881307	0.0808896
		7	12534	80.3329	73.987	5.71429		1.08577			18672.3	16264.1	0.770655			0.671261	14908.7	5.83299	5.81213	5.84489		0.118699	0.0978405	0.130604					0.0140895	0.00957277	0.0170574
		5	10250.5	81.828	65.2619	6		1.25384			16776.9	12697.2	0.807303			0.610989	11639.1	6.26743	6.28931	6.25077		0.267435	0.289307	0.250768					0.0715214	0.0836988	0.0628846
		5	9071.5	75.1664	54.9748	6.2		1.36729			12981.9	9825.03	0.923305			0.698782	9006.28	6.29012	6.2888	6.27346		0.0901244	0.0887967	0.0734577					0.00812241	0.00788485	0.00539604
		6	11885.5	89.9955	60.0199	6.5		1.49943			16969.4	14033.6	0.846934			0.700409	12864.1	6	6	6		-0.5	-0.5	-0.5					0.25	0.25	0.25
		5	9825.5	74.6402	66.2123	6.6		1.12729			15526.1	11750.5	0.836174			0.632839	10771.3	6.24212	6.25822	6.22546		-0.357876	-0.341777	-0.374543					0.128075	0.116812	0.140282
		7	11406	78.7699	56.9281	6		1.38367			14087.6	12270.7	0.929533			0.809648	11248.1	5.79043	5.79227	5.80233		-0.209572	-0.207734	-0.197668					0.0439206	0.0431536	0.0390725
		6	8693.5	68.2205	55.7516	6		1.22365			11948.7	9881.53	0.879773			0.727566	9058.07	6	6	6		0	0	0					0	0	0
		6	10692.5	79.2661	56.8262	6.33333		1.39489			14151	11702.7	0.913675			0.755603	10727.5	6	6	6		-0.333333	-0.333333	-0.333333					0.111111	0.111111	0.111111
		5	7584	66.3383	58.5223	6.6		1.13356			12196.5	9230.64	0.821612			0.621818	8461.42	6.24338	6.26239	6.22671		-0.356622	-0.337611	-0.373289					0.127179	0.113981	0.139344
		7	13181	76.2149	70.6616	6.14286		1.07859			16918.9	14736.8	0.894425			0.779068	13508.8	5.83401	5.83083	5.84592		-0.308846	-0.312024	-0.296942					0.095386	0.0973588	0.0881743
		6	12885	81.4031	64.7735	6.16667		1.25673			16564.9	13699	0.940577			0.777851	12557.4	6	6	6		-0.166667	-0.166667	-0.166667					0.0277778	0.0277778	0.0277778
		7	12367	75.6003	64.9103	6.28571		1.16469			15416.5	13428.2	0.920972			0.802191	12309.2	5.82171	5.82233	5.83362		-0.464003	-0.463388	-0.452098					0.215299	0.214729	0.204393
		5	10256.5	75.4022	61.7011	6.6		1.22206			14615.9	11061.7	0.927206			0.701734	10139.9	6.26108	6.25897	6.24441		-0.338922	-0.34103	-0.355589					0.114868	0.116301	0.126443
		6	10825.5	83.6436	58.2801	6.16667		1.4352			15314.5	12665	0.854758			0.706879	11609.6	6	6	6		-0.166667	-0.166667	-0.166667					0.0277778	0.0277778	0.0277778
		6	11384	74.8439	62.0829	6		1.20555			14597.5	12072	0.943007			0.779861	11066	6	6	6		0	0	0					0	0	0
		6	7462.5	61.0549	51.7007	5.83333		1.18093			9916.68	8201.03	0.909947			0.75252	7517.61	6	6	6		0.166667	0.166667	0.166667					0.0277778	0.0277778	0.0277778
		6	6785.5	59.0155	51.6002	6		1.14371			9566.82	7911.7	0.857654			0.709274	7252.39	6	6	6		0	0	0					0	0	0
		5	6863.5	58.3667	52.2099	6.4		1.11793			9573.44	7245.43	0.947286			0.716932	6641.65	6.24025	6.23413	6.22359		-0.159748	-0.165872	-0.176415					0.0255195	0.0275136	0.0311222
		5	7810.5	67.9176	61.4143	6.2		1.10589			13103.9	9917.41	0.787555			0.596042	9090.96	6.23785	6.26367	6.22118		0.0378454	0.0636678	0.0211787					0.00143227	0.00405359	0.000448539
		6	11240	78.3286	59.7621	6.16667		1.31067			14706.1	12161.8	0.924204			0.76431	11148.3	6	6	6		-0.166667	-0.166667	-0.166667					0.0277778	0.0277778	0.0277778
		7	11346	76.853	60.6089	5.57143		1.26802			14633.5	12746.1	0.890152			0.775346	11684	5.80695	5.80316	5.81885		0.235522	0.231734	0.247426					0.0554704	0.0537005	0.0612198
		5	8603	69.8722	53.61	6.4		1.30334			11767.9	8906.28	0.965947			0.731055	8164.09	6.27734	6.26748	6.26067		-0.122665	-0.132521	-0.139331					0.0150466	0.0175618	0.0194132
		7	8855.5	70.3263	52.061	5.85714		1.35084			11502.2	10018.7	0.883898			0.769899	9183.8	5.79512	5.79044	5.80702		-0.0620255	-0.0667067	-0.0501207					0.00384716	0.00444978	0.00251208
		5	9340.5	78.2062	52.6759	6.6		1.48467			12942.1	9794.9	0.953609			0.721717	8978.66	6.3136	6.30621	6.29693		-0.2864	-0.293788	-0.303067					0.0820249	0.0863116	0.0918494
		6	10931	77.103	59.5437	6.16667		1.2949			14423	11927.8	0.916434			0.757884	10933.8	6	6	6		-0.166667	-0.166667	-0.166667					0.0277778	0.0277778	0.0277778
		6	10093	76.1376	57.9731	5.83333		1.31333			13866.8	11467.7	0.880122			0.727855	10512.1	6	6	6		0.166667	0.166667	0.166667					0.0277778	0.0277778	0.0277778
		6	8310	71.3772	49.6297	6		1.4382			11128.9	9203.5	0.902917			0.746707	8436.54	6	6	6		0	0	0					0	0	0
		6	7794	69.7683	48.9613	6.16667		1.42497			10731.5	8874.88	0.878209			0.726273	8135.31	6	6	6		-0.166667	-0.166667	-0.166667					0.0277778	0.0277778	0.0277778
		5	9964.5	92.3801	58.6652	6.6		1.5747			17025.8	12885.6	0.773304			0.585257	11811.8	6.33161	6.36028	6.31494		-0.268393	-0.239721	-0.28506					0.0720348	0.057466	0.081259
		6	11783	86.9543	56.2247	5.83333		1.54655			15359.2	12702	0.927652			0.767162	11643.5	6	6	6		0.166667	0.166667	0.166667					0.0277778	0.0277778	0.0277778
		6	11362.5	80.584	59.9905	6		1.34328			15187.3	12559.8	0.904671			0.748157	11513.2	6	6	6		0	0	0					0	0	0
		7	12697	81.1911	66.9249	5.71429		1.21317			17070.5	14868.8	0.853933			0.743798	13629.8	5.81479	5.80582	5.82669		0.1005	0.0915381	0.112405					0.0101003	0.00837923	0.0126348
		7	9589.5	76.8541	55.6082	5.85714		1.38206			13426.3	11694.7	0.81999			0.714233	10720.1	5.79066	5.77685	5.80256		-0.0664852	-0.0802962	-0.0545805					0.00442029	0.00644748	0.00297903
		5	8555	69.4627	55.4743	6.2		1.25216			12105.8	9162	0.933748			0.706686	8398.5	6.2671	6.26368	6.25043		0.0670985	0.0636821	0.0504318					0.0045022	0.00405541	0.00254337
		6	12444	83.8716	60.7868	6.33333		1.37977			16016.7	13245.7	0.939472			0.776937	12141.9	6	6	6		-0.333333	-0.333333	-0.333333					0.111111	0.111111	0.111111
		6	7823.5	61.6552	51.639	6.16667		1.19397			10002.2	8271.79	0.945805			0.782174	7582.47	6	6	6		-0.166667	-0.166667	-0.166667					0.0277778	0.0277778	0.0277778
		6	8154.5	69.0331	52.9805	6.16667		1.30299			11490.1	9502.23	0.858167			0.709698	8710.38	6	6	6		-0.166667	-0.166667	-0.166667					0.0277778	0.0277778	0.0277778
		5	6704	64.135	50.5756	6.8		1.2681			10190.3	7712.27	0.869264			0.657882	7069.58	6.27029	6.27977	6.25362		-0.529713	-0.520232	-0.54638					0.280596	0.270642	0.298531
		5	8698.5	68.3505	62.7459	6.6		1.08932			13473.4	10197	0.853043			0.645606	9347.27	6.23453	6.24726	6.21786		-0.365469	-0.352744	-0.382135					0.133567	0.124428	0.146028
		6	10150	106.716	53.6834	6.5		1.98788			17997.8	14884.1	0.681936			0.563957	13643.8	6	6	6		-0.5	-0.5	-0.5					0.25	0.25	0.25
		6	8315	74.3417	51.791	5.83333		1.43542			12095.8	10003.2	0.831236			0.687426	9169.58	6	6	6		0.166667	0.166667	0.166667					0.0277778	0.0277778	0.0277778
		6	10453	71.3706	60.0639	5.83333		1.18824			13467.4	11137.4	0.938547			0.776172	10209.3	6	6	6		0.166667	0.166667	0.166667					0.0277778	0.0277778	0.0277778
		6	10540	74.2169	63.9064	6		1.16134			14900.4	12322.5	0.855346			0.707366	11295.6	6	6	6		0	0	0					0	0	0
		6	10598.5	77.0695	59.1461	6		1.30304			14320.5	11843	0.89492			0.740093	10856	6	6	6		0	0	0					0	0	0
		5	9576	84.7366	58.1227	6		1.45789			15472.7	11710.2	0.817751			0.618896	10734.3	6.30825	6.32803	6.29158		0.308245	0.328028	0.291579					0.0950151	0.107603	0.085018
		6	11577	103.915	54.122	6.33333		1.92001			17668.5	14611.8	0.792307			0.655232	13394.1	6	6	6		-0.333333	-0.333333	-0.333333					0.111111	0.111111	0.111111
		7	13092	74.8976	66.4347	5.85714		1.12739			15632	13615.8	0.961527			0.837515	12481.2	5.82704	5.83345	5.83894		-0.0301029	-0.0236943	-0.0181981					0.000906184	0.000561419	0.000331172
		5	7792.5	75.6316	52.9964	6		1.42711			12592.1	9530.06	0.817676			0.618839	8735.89	6.30209	6.32189	6.28542		0.302088	0.321887	0.285422					0.0912575	0.103611	0.0814656
		6	10090	74.8278	55.5784	6.16667		1.34635			13065.3	10804.9	0.933836			0.772276	9904.48	6	6	6		-0.166667	-0.166667	-0.166667					0.0277778	0.0277778	0.0277778
		6	7861	68.0655	52.1849	6		1.30431			11158.9	9228.34	0.851833			0.70446	8459.31	6	6	6		0	0	0					0	0	0
		5	6904.5	65.0874	47.8973	6.4		1.3589			9793.95	7412.32	0.93149			0.704976	6794.63	6.28845	6.28548	6.27178		-0.111554	-0.114519	-0.128221					0.0124443	0.0131145	0.0164406
		7	13388.5	76.3387	70.0552	5.85714		1.08969			16801	14634.1	0.914883			0.796887	13414.6	5.83242	5.83217	5.84433		-0.024718	-0.0249729	-0.0128133					0.000610981	0.000623644	0.00016418
		7	8106	71.6838	46.1987	5.85714		1.55164			10404	9062.16	0.894489			0.779124	8306.98	5.76643	5.76326	5.77834		-0.0907106	-0.0938789	-0.0788059					0.00822842	0.00881324	0.00621036
		6	6621	65.0208	48.197	6.5		1.34906			9845.13	8141.86	0.813205			0.672515	7463.37	6	6	6		-0.5	-0.5	-0.5					0.25	0.25	0.25
		5	10281.5	84.2891	64.5102	7.2		1.3066			17082.4	12928.4	0.795262			0.601875	11851.1	6.27799	6.30227	6.26132		-0.922013	-0.897732	-0.93868					0.850108	0.805923	0.88112
		5	7105	73.6106	41.7889	6.6		1.76149			9663.87	7313.87	0.971441			0.735213	6704.38	6.36896	6.35801	6.3523		-0.231036	-0.241991	-0.247703					0.0533776	0.0585596	0.0613566
		5	6728	60.0569	52.4297	6.2		1.14548			9892.13	7486.63	0.898668			0.680136	6862.75	6.24576	6.24936	6.2291		0.0457619	0.0493616	0.0290953					0.00209415	0.00243656	0.000846534
		6	10890	89.6022	50.9316	6		1.75927			14336.9	11856.5	0.91848			0.759577	10868.5	6	6	6		0	0	0					0	0	0
		5	9349	84.6075	60.214	6.4		1.40511			16005	12113	0.771813			0.584129	11103.6	6.29769	6.32666	6.28102		-0.102311	-0.0733398	-0.118977					0.0104675	0.00537873	0.0141556
		5	8148	60.9263	58.8253	6.4		1.03572			11259.5	8521.48	0.956172			0.723656	7811.36	6.22381	6.21591	6.20714		-0.17619	-0.184091	-0.192857					0.031043	0.0338896	0.0371938
		6	6581.5	63.8191	47.4842	6		1.34401			9520.27	7873.2	0.835937			0.691314	7217.1	6	6	6		0	0	0					0	0	0
		5	10018	66.9985	66.3531	6.2		1.00973			13966.1	10569.9	0.947783			0.717308	9689.1	6.21861	6.21239	6.20195		0.0186121	0.0123888	0.00194539					0.000346409	0.000153482	3.78454e-06
		5	13589	89.5313	69.9849	6		1.27929			19684.7	14897.9	0.912141			0.690332	13656.4	6.27253	6.27343	6.25586		0.272525	0.273431	0.255859					0.0742701	0.0747643	0.0654637
		7	12383.5	75.8922	66.1423	6		1.14741			15769.8	13735.9	0.901541			0.785266	12591.3	5.82418	5.82202	5.83608		-0.17582	-0.177981	-0.163915					0.0309127	0.0316772	0.0268682
		5	9446.5	79.1073	58.2026	6.8		1.35917			14464.7	10947.3	0.862911			0.653074	10035	6.2885	6.29925	6.27183		-0.511499	-0.500748	-0.528166					0.261631	0.250748	0.278959
		7	11436	81.6745	53.8181	5.71429		1.5176			13809.1	12028.1	0.950776			0.828151	11025.7	5.77129	5.77617	5.7832		0.0570091	0.0618819	0.0689138					0.00325004	0.00382936	0.00474912
		6	7089	69.5599	42.3835	6		1.6412			9262.01	7659.62	0.925503			0.765385	7021.32	6	6	6		0	0	0					0	0	0
		5	8646.5	69.0633	56.1897	6		1.22911			12191.4	9226.79	0.937108			0.709228	8457.89	6.26249	6.2584	6.24582		0.262489	0.2584	0.245822					0.0689003	0.0667707	0.0604284
		5	11181.5	82.8104	73.2171	6		1.13103			19047.9	14416	0.775634			0.58702	13214.6	6.24287	6.27108	6.22621		0.242872	0.271078	0.226205					0.0589867	0.0734835	0.0511688
		5	12851	99.1636	61.1437	6.2		1.62181			19048.2	14416.2	0.891429			0.674657	13214.8	6.34103	6.34608	6.32436		0.141029	0.146077	0.124362					0.0198892	0.0213384	0.015466
		6	10073	77.4669	54.6354	6		1.41789			13296.6	10996.2	0.916045			0.757563	10079.8	6	6	6		0	0	0					0	0	0
		7	8637.5	65.501	50.8414	6		1.28834			10462	9112.68	0.947855			0.825607	8353.29	5.80405	5.8085	5.81595		-0.195953	-0.191498	-0.184049					0.0383978	0.0366715	0.0338739
		6	8395	74.6591	56.3968	6		1.32382			13227.8	10939.3	0.767417			0.634649	10027.7	6	6	6		0	0	0					0	0	0
		7	10903.5	104.74	44.9626	6.14286		2.32949			14795	12886.8	0.846099			0.736974	11812.9	5.65531	5.64523	5.66722		-0.487546	-0.497627	-0.475641					0.237701	0.247633	0.226235
		5	16340.5	99.3887	71.9715	7.2		1.38095			22472.3	17007.6	0.960775			0.72714	15590.3	6.29286	6.28403	6.27619		-0.907144	-0.915966	-0.923811					0.822911	0.838994	0.853427
		5	9610.5	80.0859	52.6283	6.4		1.52173			13241.1	10021.2	0.959013			0.725806	9186.14	6.32101	6.31254	6.30435		-0.0789878	-0.087457	-0.0956545					0.00623908	0.00764873	0.00914978
		6	16865	87.5153	77.5158	5.83333		1.129			21312	17624.9	0.956886			0.791339	16156.1	6	6	6		0.166667	0.166667	0.166667					0.0277778	0.0277778	0.0277778
		6	8342.5	66.0006	62.834	5.66667		1.0504			13028.4	10774.4	0.774287			0.64033	9876.56	6	6	6		0.333333	0.333333	0.333333					0.111111	0.111111	0.111111
		5	9522.5	74.1252	56.5418	6.2		1.31098			13167	9965.11	0.955584			0.723211	9134.69	6.27886	6.27108	6.2622		0.0788627	0.0710793	0.0621961					0.00621933	0.00505227	0.00386835
		7	12489.5	76.2448	70.5399	5.85714		1.08088			16896.4	14717.2	0.84863			0.739179	13490.8	5.83368	5.82397	5.84559		-0.0234584	-0.0331779	-0.0115536					0.000550295	0.00110077	0.000133486
		7	17953	99.6764	79.3748	6		1.25577			24855.6	21649.9	0.829241			0.722291	19845.8	5.8087	5.79621	5.8206		-0.1913	-0.20379	-0.179396					0.0365958	0.0415303	0.0321828
		6	8762.5	75.3725	51.6841	6.5		1.45833			12238.3	10121	0.865777			0.715991	9277.56	6	6	6		-0.5	-0.5	-0.5					0.25	0.25	0.25
		6	14199	82.4875	72.1987	6.33333		1.14251			18709.7	15472.8	0.917674			0.75891	14183.4	6	6	6		-0.333333	-0.333333	-0.333333					0.111111	0.111111	0.111111
		7	16527	81.2693	80.0425	5.85714		1.01533	1.4015	0.313777	20436.1	17800.3	0.928465	0.88464	0.0749041	0.808718	16317	5.84305	5.84473	5.85495		-0.0140941	-0.0124086	-0.00218938					0.000198645	0.000153974	4.7934e-06

## Sheet: deviation
	deviatioin	avg	std		deviatioin	avg	std		deviatioin	avg	std		deviatioin	avg	std		deviatioin	avg	std		deviatioin	avg	std		deviatioin	avg	std		deviatioin	avg	std
Büchner et al. 2016 Fig2b two-dimensional SiO2 ring	4.46025	0.000886239	3.7298	Aboav 1985 Fig1 Voronoi polygons	0.407086	-0.00982919	2.47619	Mombach et al. 1990 Fig1a epidermal tissue of Allium sativum (garlic)		0.0083742	2.45741	Mombach et al. 1990 Fig1b epidermal tissue of Allium cepa (onion)		0.0251235	4.57539	Mombach et al. 1990 Fig1c epidermal tissue of Agave attenuat	-0.52443	7.15689e-05	1.14247	onion images were taken by the author of this study		0.00241691	1.84371	Reich et al. 2018 Fig2a shells of A. vexillum	-1.38532	7.91744e-05	0.885963	Aboav 1980 Fig1d soap	-1.61244	2.65756e-05	1.13724
	-1.45693	62			-0.669387	286			2.1347e-06	56			5.52948	57			0.618297	60			0.808698	113			1.31547	170			2.11006	118
	-2.48702				1.02515				-4.1904e-06				-15.4905				-0.603938				-1.08558				-0.643879				-1.64603
	4.99497				-1.19258				1.39321e-06				7.22206				0.652839				0.748629				0.477251				1.47896
	-2.50455				1.99227				-4.79598e-06				-6.67717				-0.567863				-1.01434				-0.514723				-2.14734
	-1.14944				-1.56199				6.16364e-06				14.3803				0.425119				1.55492				0.751617				1.81768
	4.67322												-4.4999								-1.009
	-6.52511				-2.41729e-05				-0.767836								4.13914e-05								2.09074				0.215287
					6.38812e-06				4.04152				-3.09729				-3.51198e-05				-0.907632				-1.31778				-0.135988
	5.08726				-1.02164e-05				-1.5982				9.45582				-4.12374e-06				1.23257				0.885022				0.116763
	-4.0511				2.82798e-05				2.75094				-4.28807				4.46836e-05				-1.37179				-1.33374				-0.158439
	1.8904				-6.45045e-05				-6.13026				3.92479				-4.76186e-05				0.792349				1.27717				0.21482
	1.41279								1.81092				-9.01415								-1.01305				-1.60115				-0.252429
	-5.5699				0.0593933								3.31644				-1.99189				1.27395
	8.25757				-0.124924				3.94545								1.52604								5.88806e-05				0.000407105
	-7.02603				0.295319				-4.95752				3.80448e-07				-1.02784				2.33318				-5.9542e-05				-0.000718163
					-1.09223				0.779328				4.80463e-06				1.1761				-2.43035				5.82248e-05				-0.00240118
	2.72487				2.86058				-0.604078				1.44311e-05				-0.750686				2.55882				-1.07811e-05				0.00472719
	-4.08521				-1.98715				1.1511				-1.88977e-05				-0.217993				-2.11041				-6.14094e-07				-0.00242763
	1.97361								-0.292669				7.88236e-06				1.28718				3.2003
	-2.111				-1.05326e-05																-3.54807				0.642967				-0.584661
	3.39528				3.83866e-06				-2.61977e-05				-0.261532				2.92693								-0.372157				-0.497072
	-1.88668				-9.35026e-07				4.28563e-05				0.770926				-3.02941				9.06193e-05				0.339442				1.41213
					2.03392e-05				6.59698e-05				-0.347011				2.06841				-3.0647e-06				-0.361464				-1.86784
	-1.92349				7.31493e-06				-8.14129e-05				0.201096				-1.86372				2.84747e-05				0.458959				1.76353
	2.05188								2.13219e-05				-0.798158				1.89325				8.15143e-05				-0.705429				-1.43994
	-2.41731				-1.04841e-05								0.435991				-1.99363				-4.89732e-05								1.21414
	1.95698				2.72664e-05				0.150095																0.00154175
	-1.9819				-1.25218e-05				-0.268768				1.79945				0.152243				3.16196e-07				-6.13124e-05				1.31641
	2.31428				1.42553e-05				0.0768415				-5.05081				-0.209802				-2.84826e-06				0.000175796				-0.5522
					6.47857e-06				-0.19321				2.19675				0.234017				1.65859e-06				0.000867439				-0.0668777
	0.000260033								0.282239				-1.75245				-0.167835				1.09971e-06				0.000216608				1.24562
	-5.55165e-05				-4.59494e-07				-0.0470052				4.61733				0.172013				1.48747e-06								-2.42443
	3.20299e-05				2.65976e-06								-1.76048				-0.180235								-1.1159e-07				2.32747
	0.000207878				-9.07003e-07				2.49305												0.139814				-7.01631e-07				-1.84576
	-7.8276e-05				1.38036e-07				-6.78358				1.65504				-0.861701				-0.364582				8.60016e-07
					4.11751e-06				1.67945				-0.929274				0.998102				0.286653				-8.31278e-07				4.37423e-05
	-6.16167e-05								-3.20491				2.69264				-0.855555				-0.198438				1.79269e-07				-3.30083e-05
	0.000111121				-2.40895e-06				8.27433				-9.97117				0.86223				0.413878								3.20832e-05
	-5.63849e-05				6.79467e-06				-2.26423				9.44711				-0.710919				-0.276464				0.547203				2.24708e-06
	5.88114e-05				2.51173e-05								-2.51017				0.567888								-0.50267				-1.66357e-05
	-2.04742e-05				-3.34119e-05				0.000113967												-1.01349				0.436427
					1.52911e-05				9.20463e-05				0.000129549				1.89005				2.59328				-0.363771				-0.541757
	-3.11058								0.00045232				-0.000136636				-1.38176				-1.57315				0.342398				0.545098
	3.48514				-1.25377				-0.000207753				6.323e-05				0.56735				1.61193				-0.459507				-0.995186
	-1.88844				3.88693				-4.39435e-05				-7.52293e-05				0.974149				-2.68913								1.12988
	2.98517				-2.36346								2.9042e-05				-2.4713				1.0881				-0.916361				-0.82001
	-3.30522				1.17803				-1.08831								2.36077								0.848632				0.682039
	1.83757				-1.96415				3.19178				-1.40579				-1.93892				1.06035				-1.46241
					0.564187				-1.22497				4.60097								-2.45757				1.5087				0.512063
	6.58779								2.07116				-2.01523				-0.795248				1.05106				-0.816286				-0.34952
	-6.08385				-0.236386				-4.47504				1.66256				0.705736				-1.12014				0.837846				-0.428381
	5.98867				0.464847				1.56482				-4.10156				-0.687253				3.98754								0.898602
	-7.03352				-0.297415								1.36378				0.756134				-2.48965				0.000305642				-0.560556
	5.61018				0.0571642				-0.750296								-0.736232								-0.000951426				0.188357
	-5.06622				-0.182728				3.21006				-0.506023				0.756918				3.82551e-05				0.00134891				0.38452
					0.194723				-4.97153				3.90611								-2.9169e-05				-0.00165367				-0.645052
	-3.22525								2.11489				-2.43136				0.000623338				4.30711e-05				0.00138345
	5.36537				3.00786e-05				-0.922225				1.91299				0.000287822				9.96542e-06								0.783745
	-3.50232				6.49936e-06				1.42516				-3.23604				-0.000213761				-1.35937e-05				0.285811				-1.17169
	3.83398				-1.00114e-05								0.4845				0.000500598								-0.257489				1.32133
	-6.18173				3.04846e-05				4.3297e-06								-0.00060555				8.91238e-06				0.391052				-0.925229
	3.73624				-5.77108e-06				-3.56393e-06				-7.66635e-06								-1.04459e-05				-0.324778				0.845548
									3.81759e-06				-4.18485e-06				0.499189				5.63712e-06				0.134648				-0.853664
	-0.636201				-1.41654				-4.22521e-06				9.02084e-05				-0.382386				5.71753e-06				-0.229159
	-1.19176				1.83876				7.12189e-06				-4.41999e-05				0.425021				-3.16724e-06								-2.2897e-05
	2.67409				-1.93105								3.06275e-05				-0.498296												2.50777e-05
	-2.81766				1.09011												0.44565							Reich et al. 2018 Fig2b shells of A. rigida	-5.94958e-06	6.10514e-05	0.959984		-5.08582e-06
	4.32329				-1.0018												-0.489098				-1.64335				0.000195957				4.25236e-06
	-4.66671				1.42359																2.861				0.000114317				2.63136e-05
	2.31885																				-0.879966				4.01688e-05
					-1.06951e-05																0.836206				0.000188879			Aboav 1980 Fig1e soap	0.000167708	3.37188e-05	1.25285
					3.3046e-05																-2.4541								-7.6477e-05
					-2.51569e-05																1.30083				0.25197				-6.11147e-05
					-3.86036e-05																				-0.28444				5.27993e-05
					3.85712e-05																2.62361				0.310536				-0.000143814
																					-5.90902				-0.341944
					6.74144																2.88466				0.387259				-5.45036e-06
					-8.37362																-4.03784				-0.323323				1.2005e-05
					4.52154																9.36338								-1.07747e-05
					-1.70272																-4.7898				-0.826227				1.87086e-05
					0.0305838																				1.47493				-1.10227e-05
					2.20885																-0.0593346				-1.41949
					-3.3965																0.095587				0.98798				-1.20683
																					-0.0334738				-0.86963				1.74278
					2.78757e-07																0.0246842				0.652488				-1.56774
					-1.8432e-06																-0.0803179								1.57287
					-1.38693e-06																0.0530189				0.578276				-1.32455
					1.09389e-06																				0.0475236				0.783724
					-3.59186e-06																0.127305				-1.77363
																					-0.394114				1.98605				-2.8849
					1.53415e-06																0.151339				-2.5095				2.72727
					-8.13929e-06																-0.129597				3.0997				-1.61206
					1.04166e-05																0.579972				-1.42504				1.63776
					-8.1948e-06																-0.333529								-2.80868
					7.5353e-06																				1.14011				2.94144
																					0.000155439				-1.10752
					-0.474961																-1.12913e-05				1.17208				-0.210024
					-1.16705																3.57317e-05				-1.51896				0.176392
					3.65841																0.000121993				1.70083				-0.306239
					-2.72484																4.47436e-05				-1.38614				0.479631
					0.919072																								-0.432169
					-1.57646																5.15506e-05				4.43232e-05				0.292469
					0.70991																-2.95114e-05				2.76442e-05
					0.657795																1.74535e-05				2.99165e-06				0.139691
																					1.82938e-05				4.4314e-06				-0.31969
					0.000110761																3.10948e-05				1.25451e-05				0.406838
					-0.000229474																								-0.222827
					0.000208452																-0.299593				-0.415384				0.143709
					0.000279571																1.1186				0.579425				-0.147718
					-0.000202112																-0.661595				-0.980013
																					0.447064				1.0687				-0.000856569
					-1.41853e-05																-1.24091				-0.859804				0.0016523
					1.36396e-05																0.639783				0.607382				-0.000609407
					-1.36177e-05																								0.00103047
					2.37708e-05																-1.0779				0.000212805				-0.000478015
					2.52638e-06																2.38626				-0.000147232
																					-1.14822				7.76637e-05				-0.248647
					-0.0248416																0.990315				-1.10694e-05				0.127329
					0.00784056																-3.4531				-0.000160559				-0.120731
					-0.0237972																2.3276								0.101817
					0.0207726																				-0.462967				-0.217637
					-0.0215966																-2.23194e-05				0.414658				0.35787
					0.0416252																7.05e-05				-0.631537
																					-4.57222e-05				0.873994				-5.2095e-06
					0.791678																-1.89853e-05				-0.873451				-6.56721e-05
					-4.09399																0.000110678				0.679241				0.000108261
					6.8065																								-0.000100542
					-3.75338																1.17627				6.89263e-06				0.000107651
					-1.82278																-1.99844				-3.47537e-05
					6.68558																1.27548				3.51432e-05				3.61418
					-4.46122																-1.01079				-1.93628e-05				-3.3547
																					4.25149				3.35577e-05				0.42024
					-1.65442																-3.67025								1.38313
					1.88741																			Reich et al. 2018 Fig2c shells of P. nobilis	-0.298388	3.89499e-05	0.978489		-1.34173
					-3.80237																				0.344742				1.72835
					6.38422																				-0.3574				-2.44943
					0.221111																				0.353703
					-3.2904																				-0.272999
					0.340738																				0.230353
					1.38333e-05																				0.557886
					2.68031e-05																				-0.702677
					2.37995e-05																				0.730004
					2.45756e-05																				-0.578588
					-2.61492e-05																				0.448802
																									-0.455195
					7.23392e-05
					-7.09623e-06																				-1.71071e-05
					5.26952e-05																				3.41353e-05
					-7.4536e-05																				-4.55828e-05
					-8.40046e-05																				5.4967e-05
																									-1.85049e-05
					8.60292e-05
					-7.32376e-05																				1.72868e-05
					7.83596e-05																				2.91443e-05
					1.70215e-05																				-9.8499e-06
					-3.79005e-05																				-1.12598e-05
																									7.15483e-05
					-2.17015
					2.51015																				0.651079
					-3.08334																				0.156235
					4.76487																				-0.740426
					-3.1172																				1.93926
					1.09822																				-2.07098
																									1.3298
					3.06287e-06																				-1.26346
					3.39422
					-5.05733e-06																				-0.539684
					6.99727e-06																				0.621965
					-5.0415e-06																				-0.637355
																									0.518421
					-3.00461																				-0.5823
					3.11164																				0.619073
					-3.97113
					2.82132																				-1.56494
					-2.37137																				1.44134
					3.41915																				-1.79962
																									1.95741
					0.00109286																				-2.90007
					-0.000291277																				2.86605
					0.000815518
					0.00146492																				0.957672
					-0.000606914																				-0.971011
																									0.839015
					0.968203																				-1.5211
					-1.64921																				1.59672
					1.60262																				-0.901275
					-1.14972
					-0.269314																				1.17859e-06
					1.28611																				-5.71336e-05
					-0.78288																				9.17956e-06
																									-0.000109896
					-0.0604841																				0.000109031
					0.0356177
					-0.28552																				-7.35017e-05
					1.45983																				0.000155062
					-1.18254																				-9.66627e-05
					0.0336956																				-5.97568e-05
																									0.000180765
				Aboav 1985 Fig6 Voronoi polygons	7.96187e-06	-0.056507	3.15327
					0.000119967
					-8.96903e-05
					0.000125906
					6.15819e-06
					3.04024e-06
					1.42462e-06
					-2.11456e-06
					-3.7092e-07
					5.06744e-06
					5.17457e-05
					-0.000184544
					0.00035286
					-7.78727e-05
					0.000119997
					8.01122
					-5.34892
					-2.22268
					4.22653
					-6.8916
					6.06625
					-10.6013
					8.21597e-07
					3.74125e-06
					-4.5344e-06
					2.04271e-06
					-3.28441e-06
					0.000343235
					-0.00023051
					0.000781943
					1.67824e-05
					-1.69508e-05
					-4.37515
					8.04222
					-8.6421
					5.71145
					-2.97952
					-2.14374
					4.38825
					9.19002e-06
					-2.19397e-06
					1.98223e-05
					-2.0061e-05
					2.12874e-05
					-6.38295
					9.48258
					-4.59462
					2.91196
					-7.78825
					6.45147
					5.43032e-05
					-2.48501e-05
					-4.9707e-06
					-3.51791e-05
					-2.91203e-05
					-5.73612e-07
					1.67928e-06
					-1.0446e-06
					-2.14602e-07
					2.77085e-07
					-0.548221
					1.00196
					-1.78858
					1.39569
					-4.85988
					2.80593
					2.02964
					0.0744171
					-0.0405307
					0.272233
					-0.530935
					0.535116
					-0.310059
					0.581968
					-1.51678
					2.29971
					-1.38608
					0.353447
					-0.329871
					-5.72737e-05
					-1.35882e-05
					-5.69698e-05
					0.000112092
					6.3419e-05
					0.1343
					-0.208337
					0.449802
					-0.920874
					0.939954
					-0.392777
					7.39064
					-2.9082
					0.556939
					-0.804593
					0.353503
					-4.58382
					1.81857e-06
					-2.6267e-06
					3.67683e-06
					-2.72523e-06
					3.56219e-06
					-1.55094
					1.4986
					0.456032
					-3.1881
					2.95047
					-1.1153
					-0.68831
					1.64223
					5.48647
					-6.3321
					2.85148
					-1.67858
					-1.87432
					7.54925
					-5.92986
